# Supplementary material for: Hypermethylation of Tumor Suppressor Genes Involved in Critical Regulatory Pathways for Developing a Blood-Based Test in Breast Cancer
Source: PubMed Central journal article supplement (PMC3025923; doi:10.1371/journal.pone.0016080), 2011-01-24
Supplement: pone.0016080.s001.pdf [file pone.0016080.s001.pdf]

## Dataset S1

High-throughput methylation analysis of CpG sites in 10 candidate genes related to breast cancer.

APC Gene

| Gene ID | Alternate gene name        | locus    | Function                                                                                                      | Methylation effect on breast cancer |
|---------|----------------------------|----------|---------------------------------------------------------------------------------------------------------------|-------------------------------------|
| 324     | adenomatous polyposis coli | 5q21-q22 | Cell adhesion, signal transduction, stabilization of the cytoskeleton, regulation of cell cycle and apoptosis | direct                              |

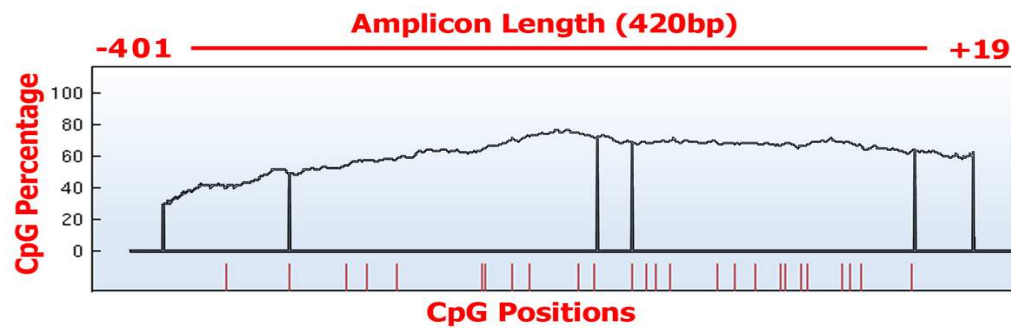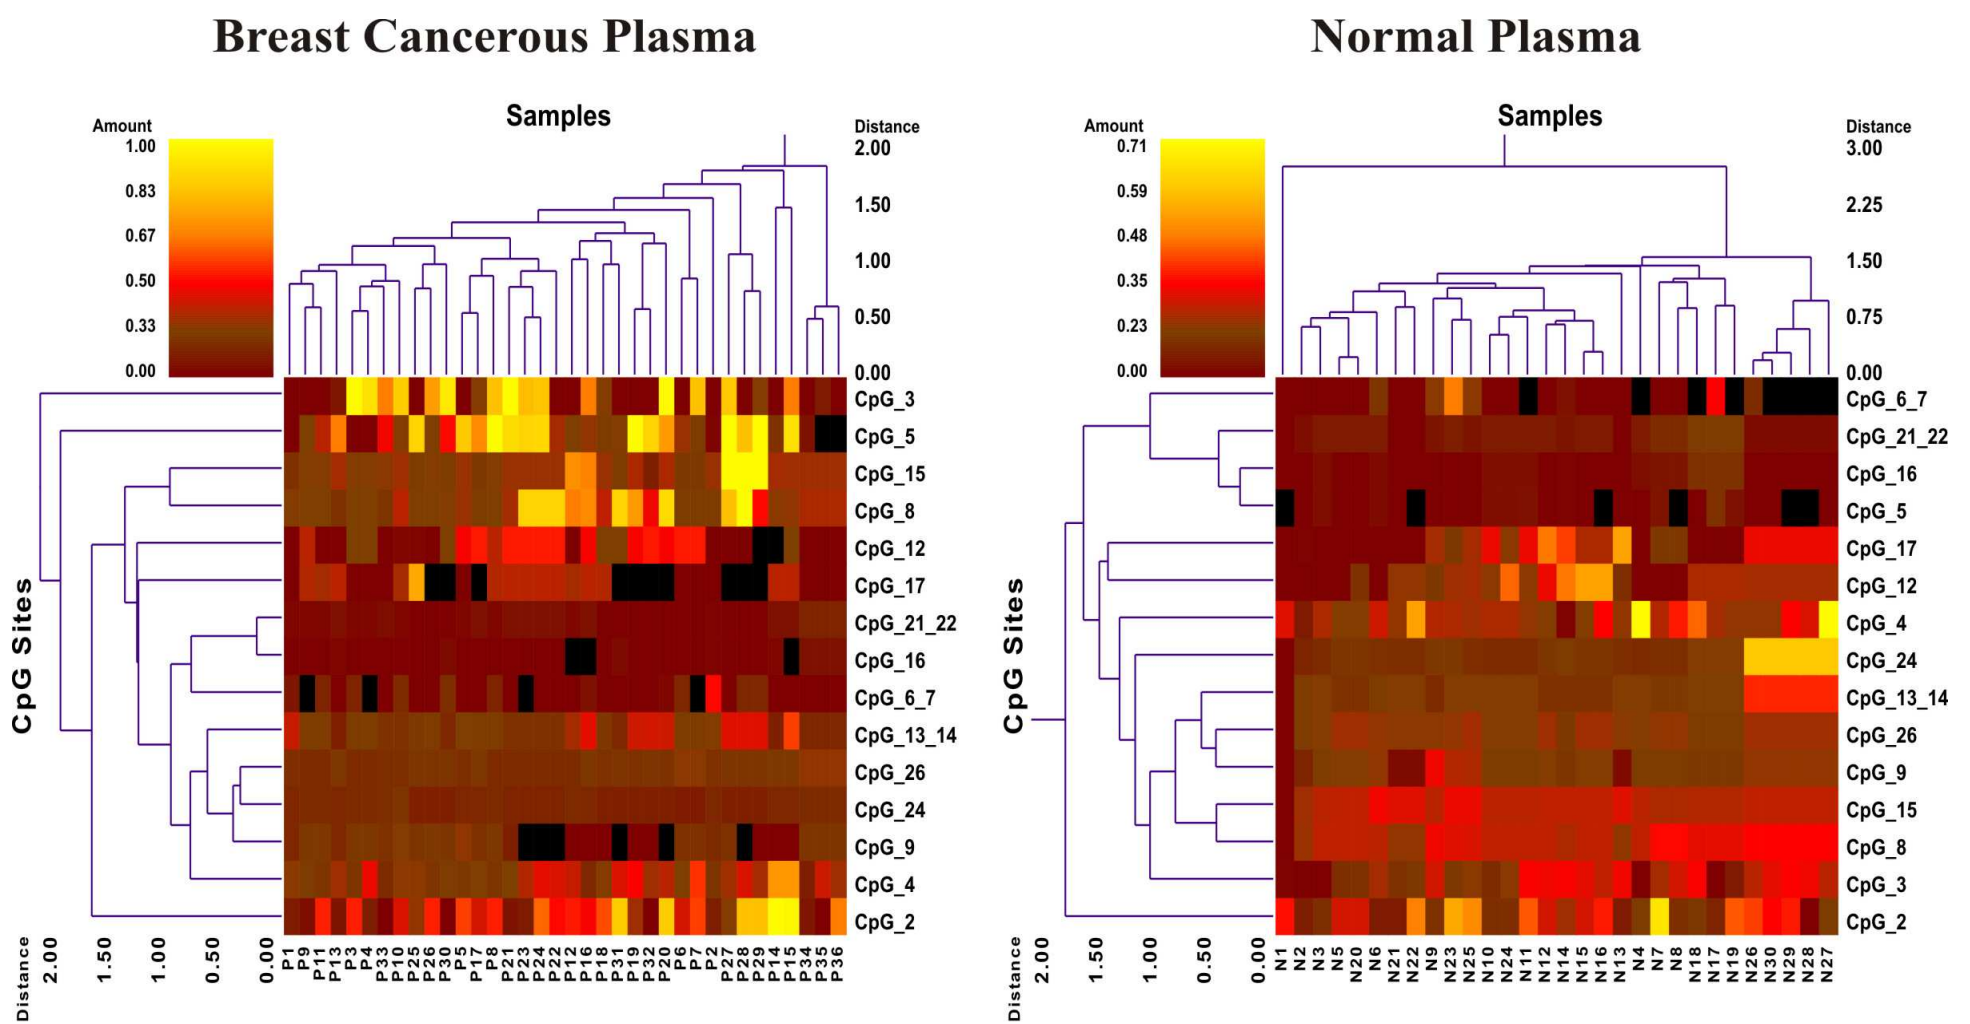

**Double dendrogram of APC gene:** Two-way hierarchical cluster analysis of 36 plasma samples from breast cancer patients and 30 plasma samples of normal subjects. (Red clusters indicate 0% methylated, yellow clusters indicate 100% methylated, color gradient between red and yellow indicates methylation ranging from 0-100, and black clusters indicate not analyzed CpG sites).

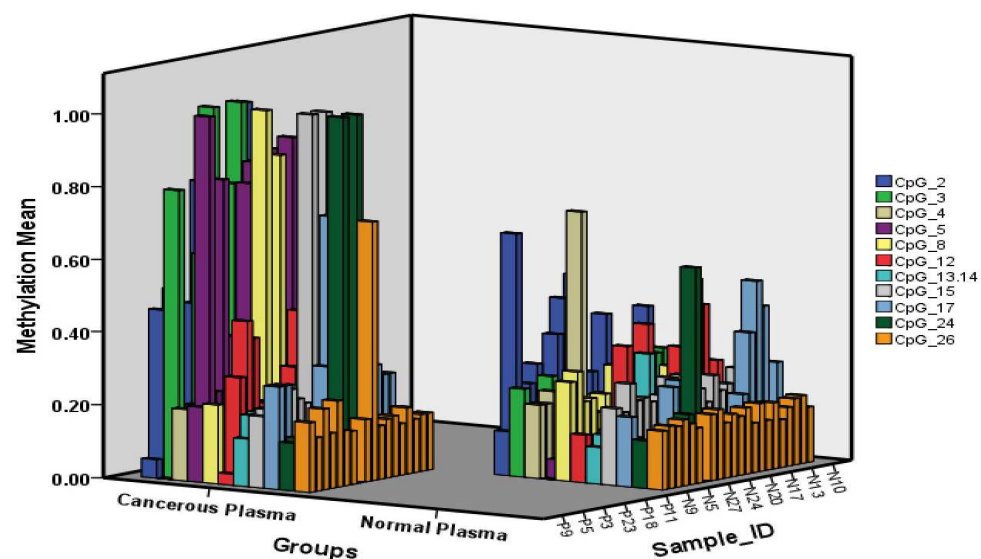

**Comparison of informative CpG sites in two groups of plasma samples.**

### Breast Cancerous Tissue

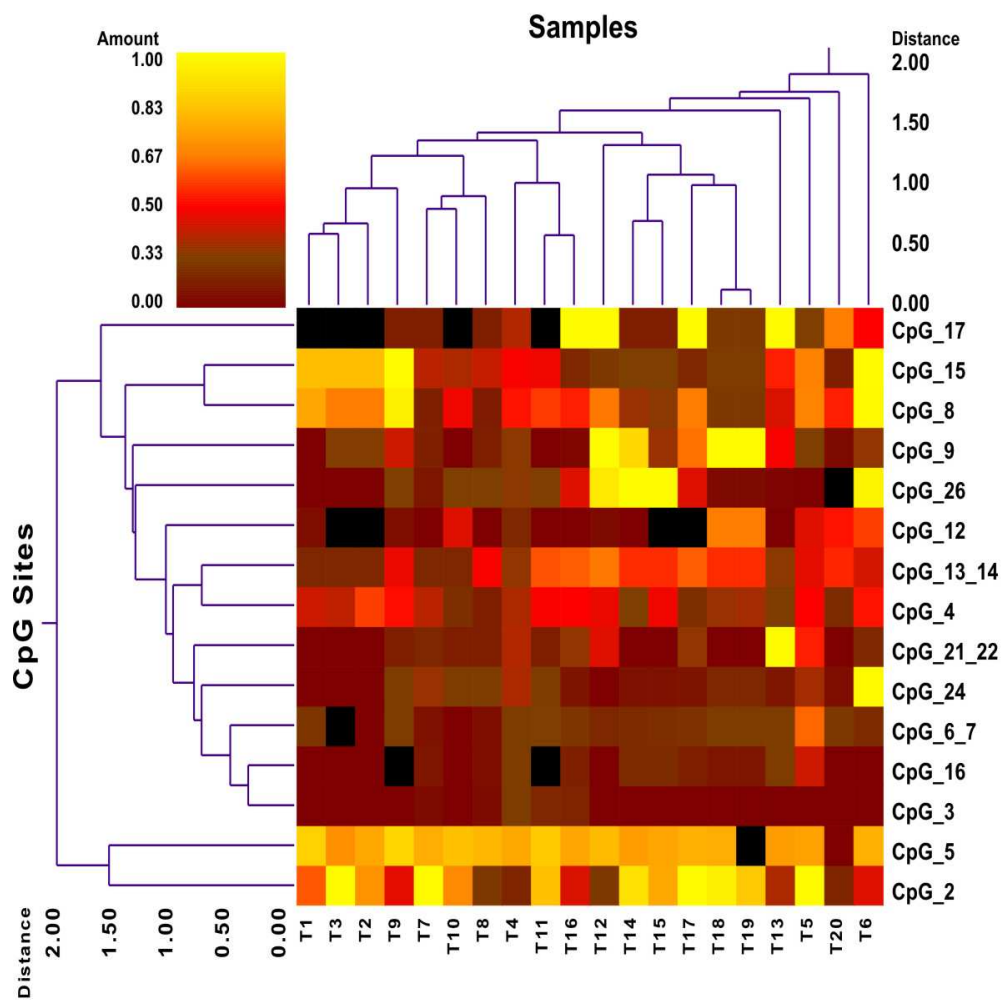

### Breast Cancerous Serum

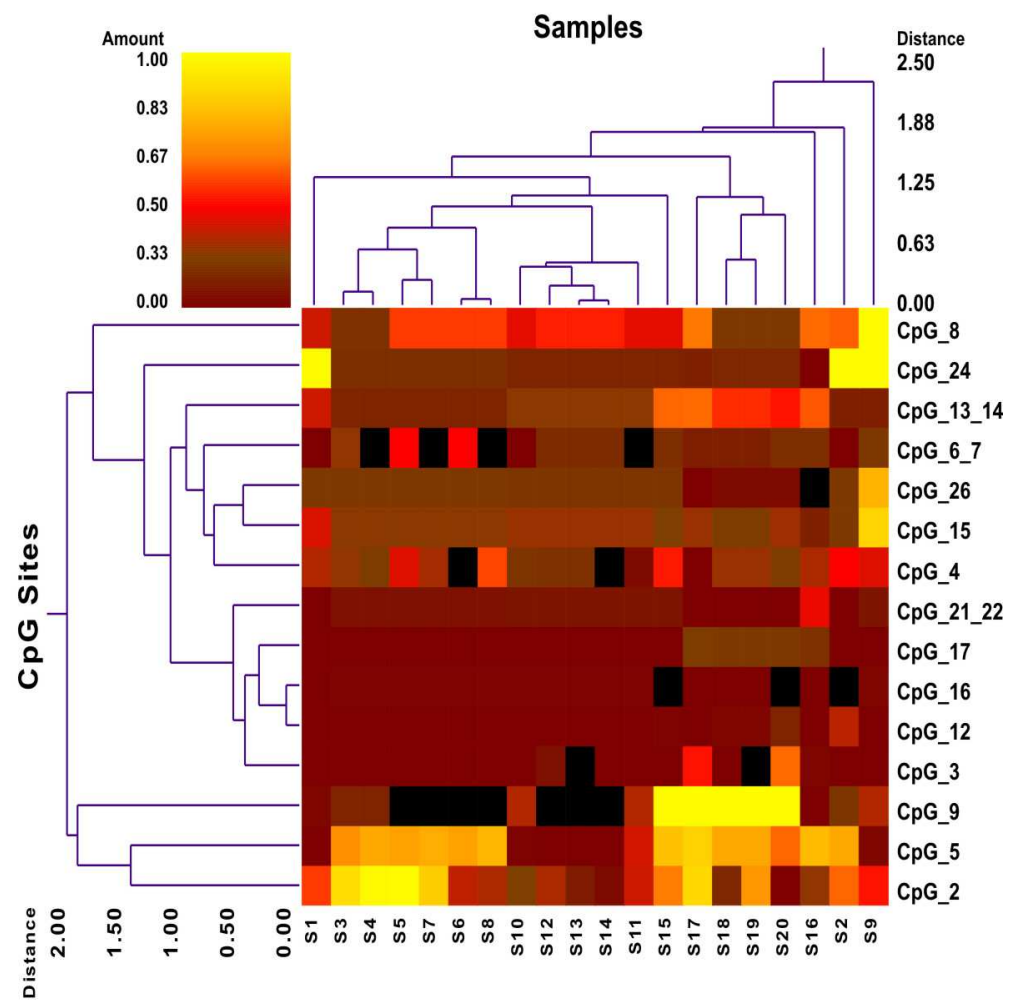

### Adjacent Normal Tissue

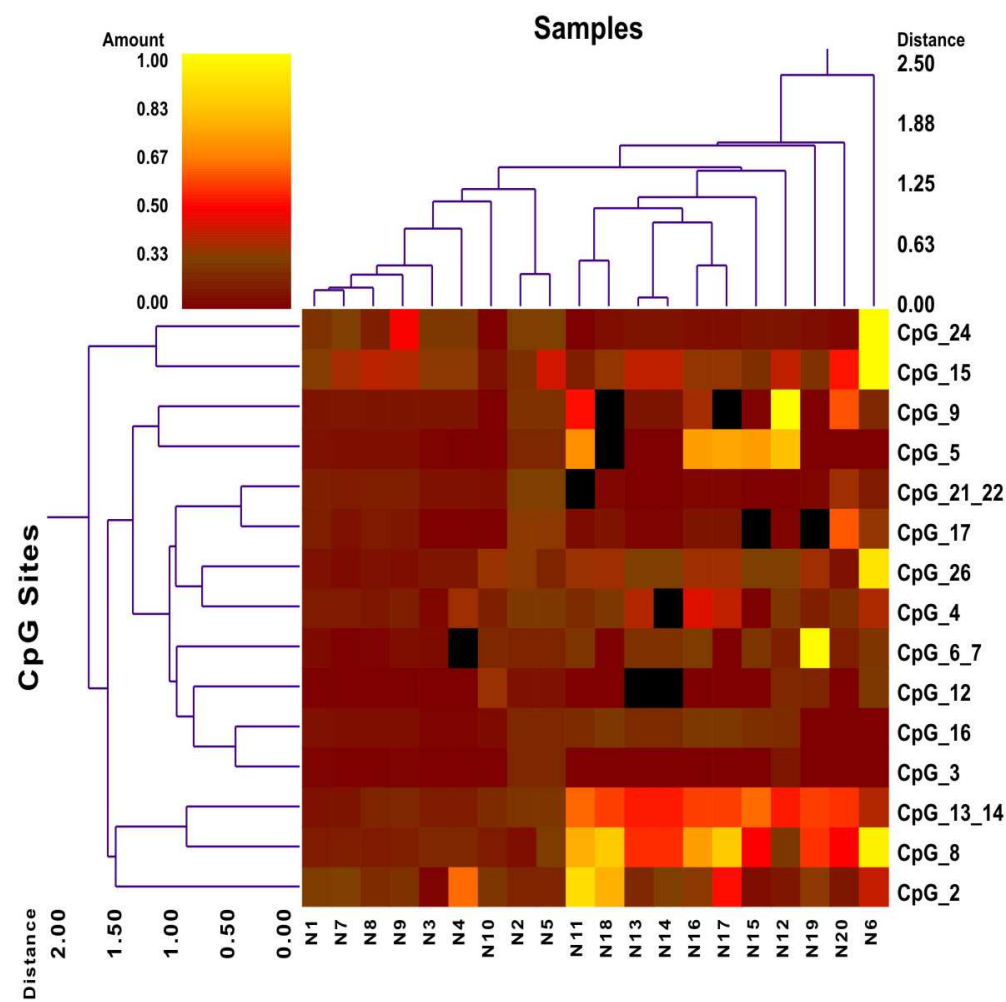

**Double dendrogram of APC gene:** Two-way hierarchical cluster analysis of 60 triple samples (breast cancerous tissue, matched normal tissue serum and samples) from 20 breast cancer patients. (Red clusters indicate 0% methylated, yellow clusters indicate 100% methylated, color gradient between red and yellow indicates methylation ranging from 0-100, and black clusters indicate not analyzed CpG sites).

**BINI Gene**

| Gene ID | Alternate gene name   | locus | Function                                                                                                                                                                  | Methylation effect on breast cancer |
|---------|-----------------------|-------|---------------------------------------------------------------------------------------------------------------------------------------------------------------------------|-------------------------------------|
| 274     | Bridging integrator 1 | 2q14  | Encodes several isoforms of a nucleocytoplasmic adaptor protein, one of which was initially identified as a MYC-interacting protein with features of a tumour suppressor. | direct                              |

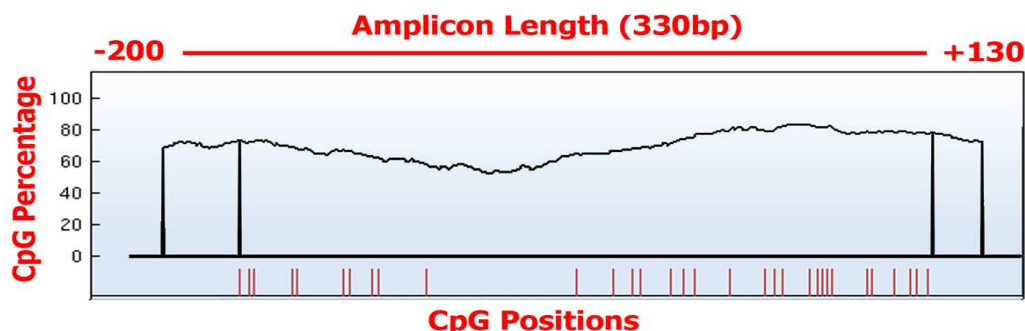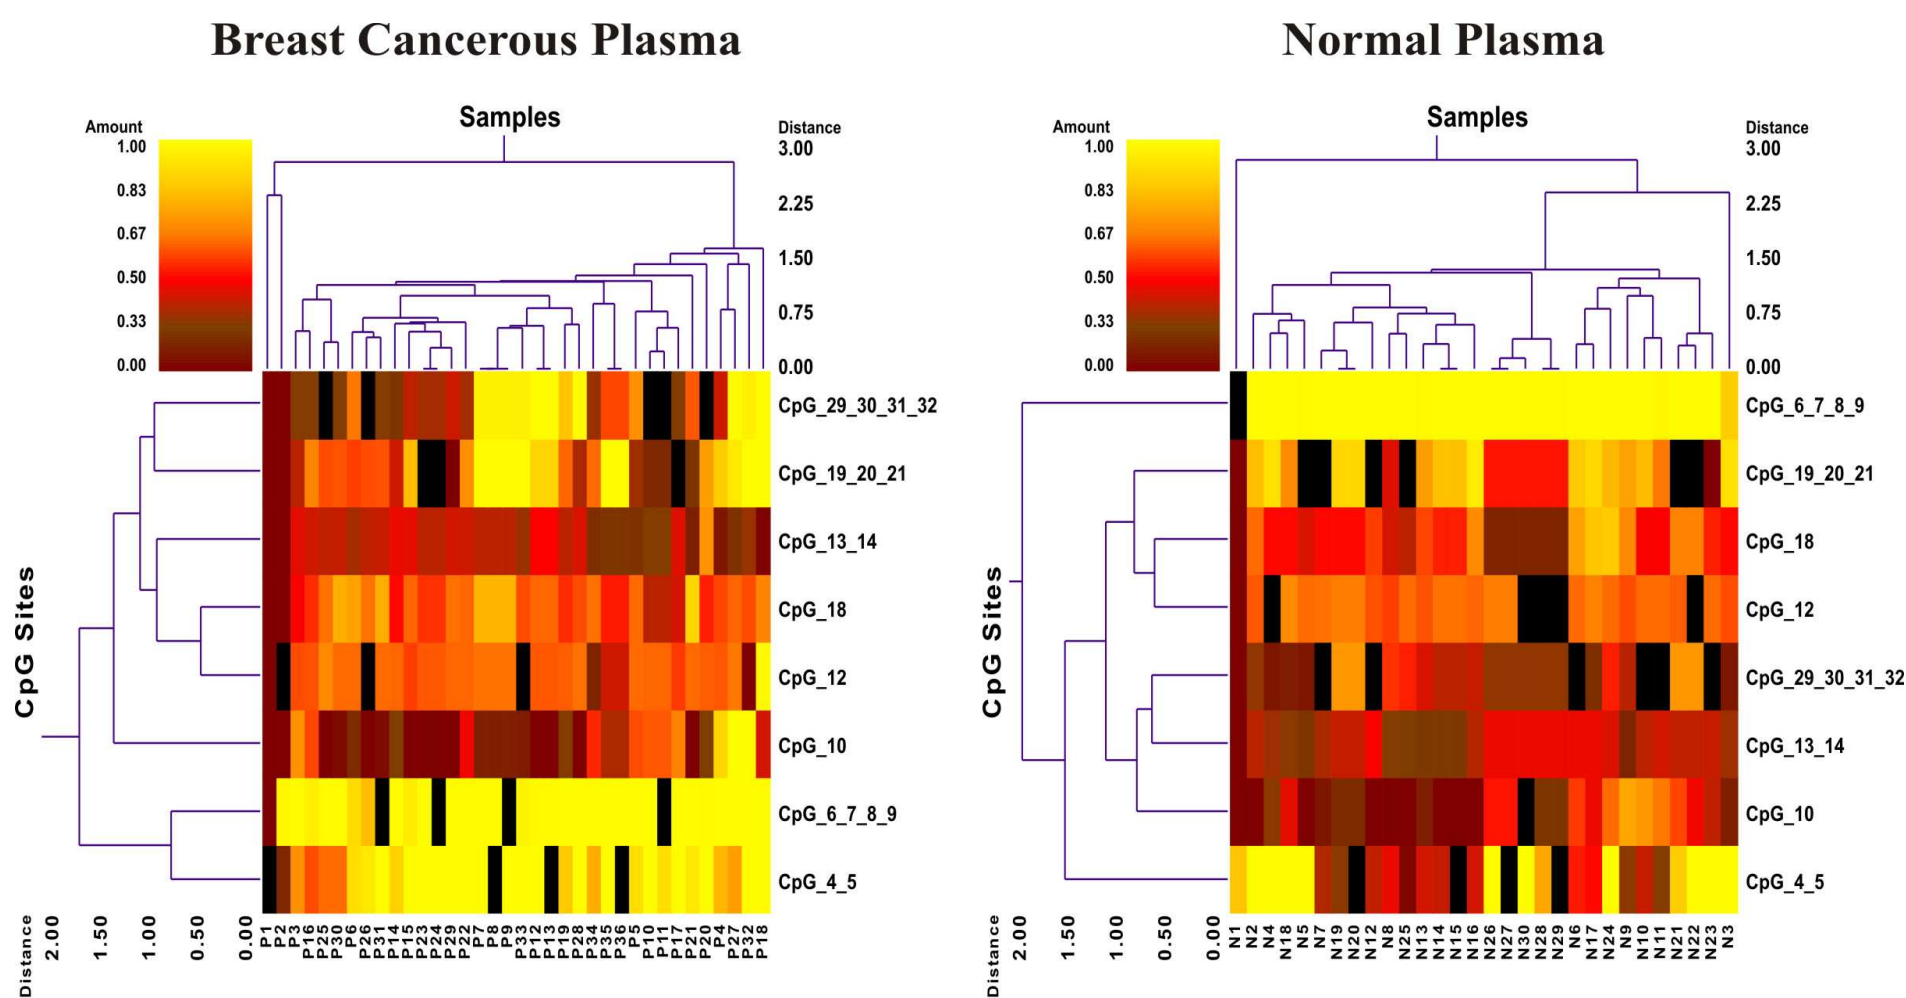

**Double dendrogram of *BINI* gene:** Two-way hierarchical cluster analysis of 36 plasma samples from breast cancer patients and 30 plasma samples of normal subjects. (Red clusters indicate 0% methylated, yellow clusters indicate 100% methylated, color gradient between red and yellow indicates methylation ranging from 0-100, and black clusters indicate not analyzed CpG sites).

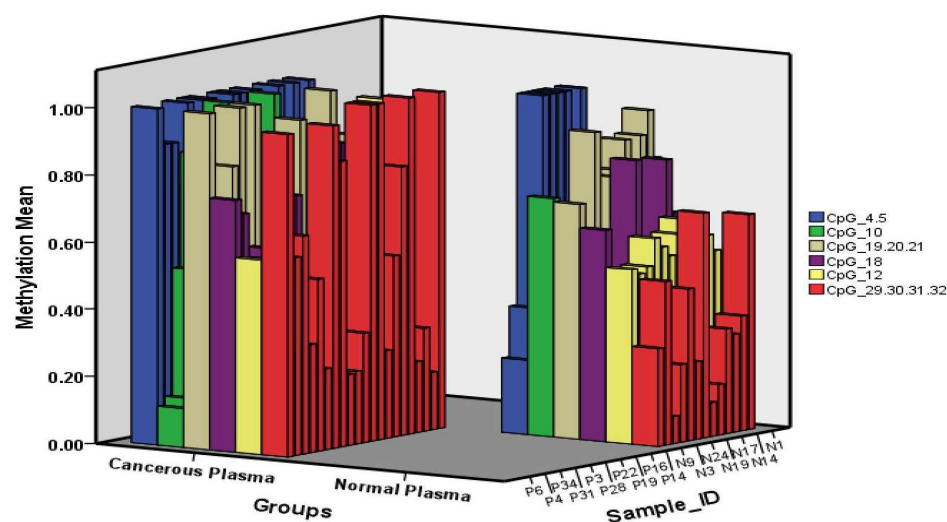

**Comparison of informative CpG sites in two groups of plasma samples.**

### Breast Cancerous Tissue

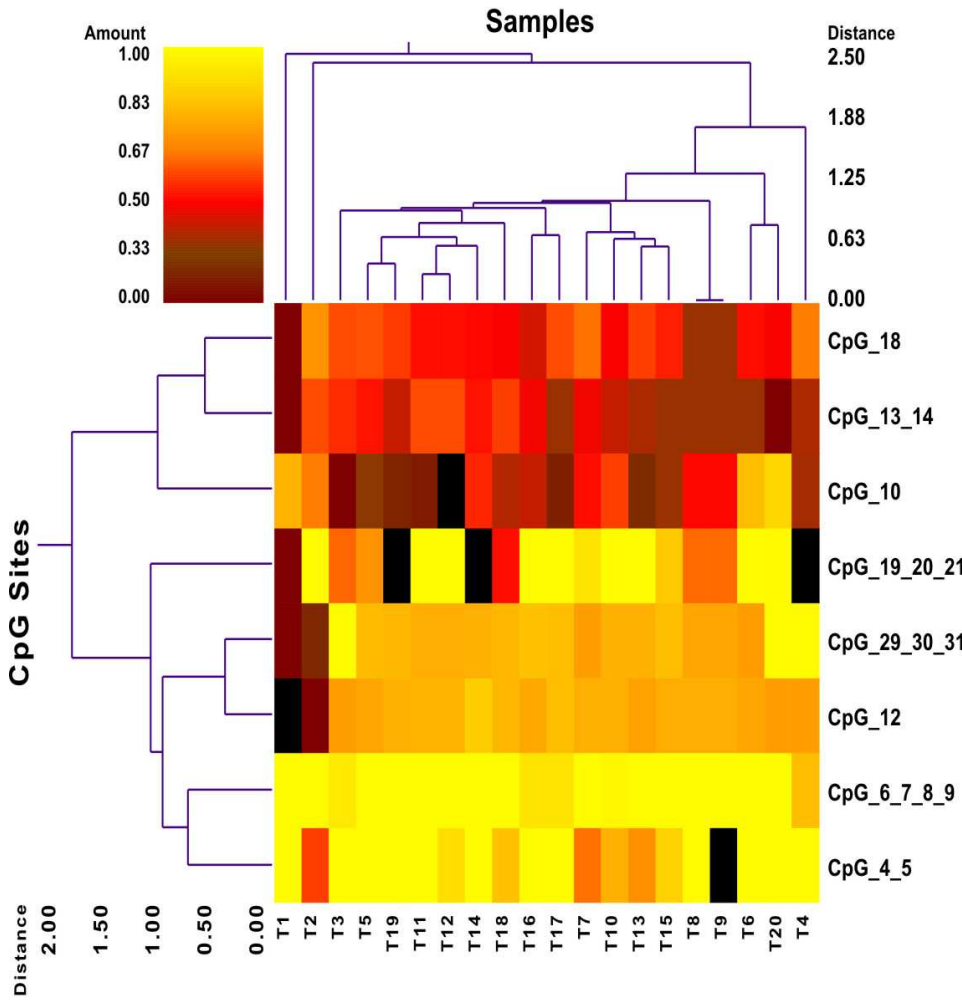

### Breast Cancerous Serum

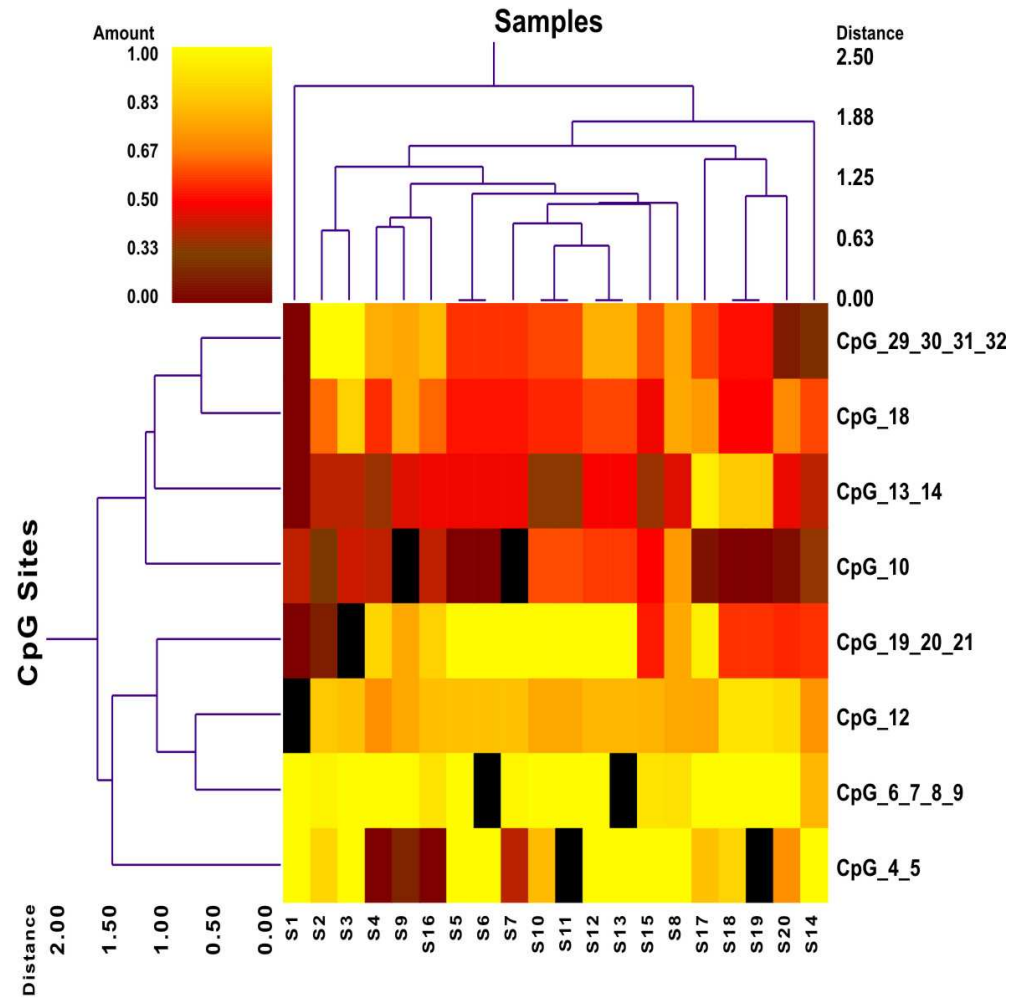

### Adjacent Normal Tissue

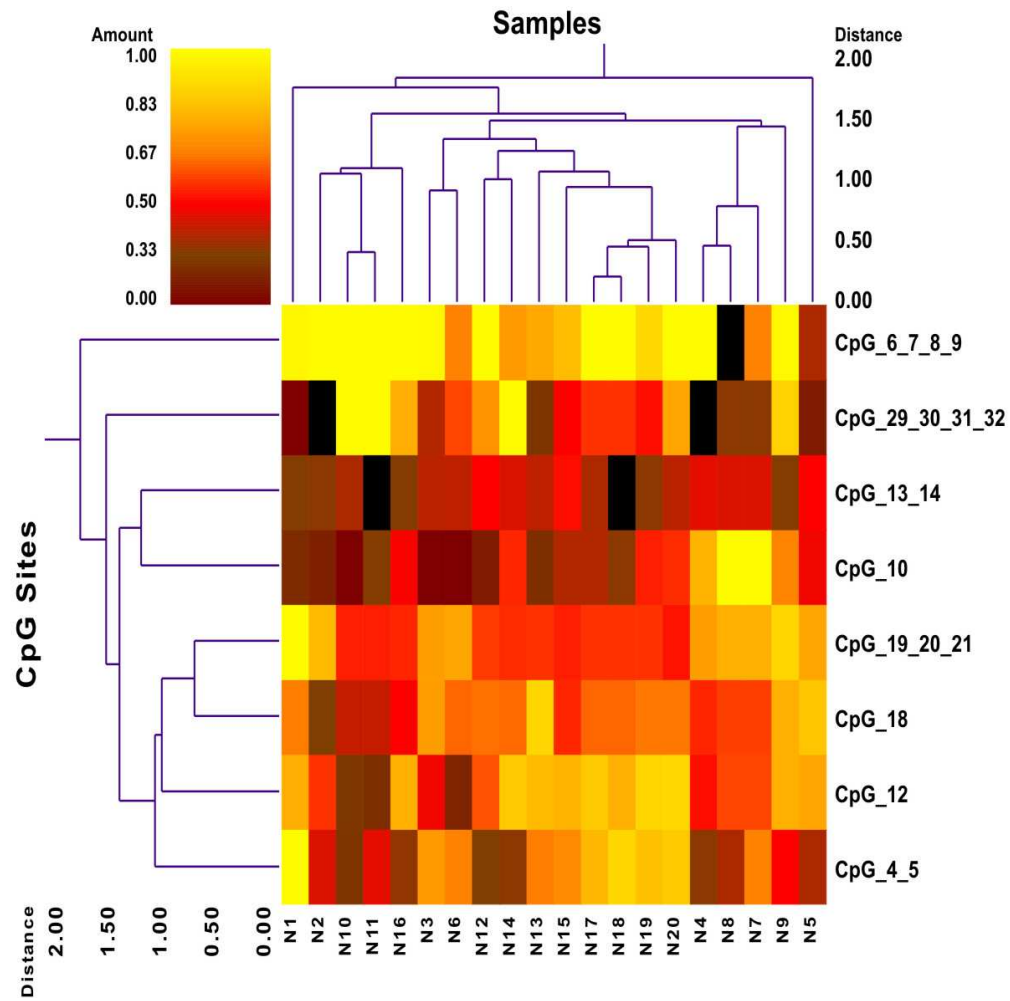

**Double dendrogram of *BIN1* gene:** Two-way hierarchical cluster analysis of 60 triple samples (breast cancerous tissue, matched normal tissue serum and samples) from 20 breast cancer patients. (Red clusters indicate 0% methylated, yellow clusters indicate 100% methylated, color gradient between red and yellow indicates methylation ranging from 0-100, and black clusters indicate not analyzed CpG sites).

**BMP6 Gene**

| Gene ID | Alternate gene name          | locus    | Function                                                                             | Methylation effect on breast cancer |
|---------|------------------------------|----------|--------------------------------------------------------------------------------------|-------------------------------------|
| 654     | bone morphogenetic protein 6 | 6p24-p23 | The bone morphogenetic proteins (BMPs) are a family of secreted signaling molecules. | direct                              |

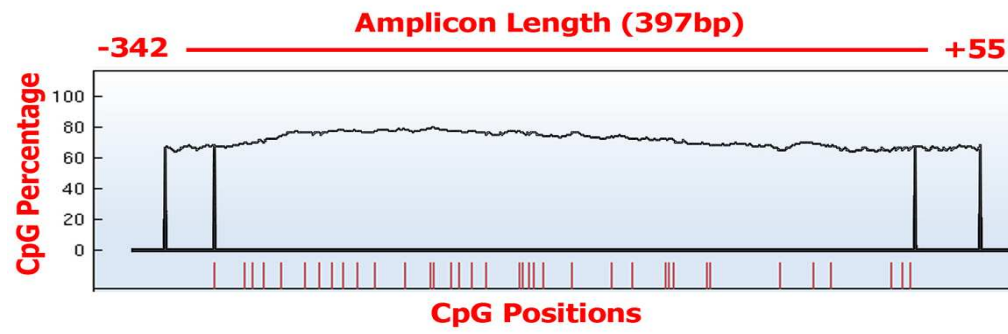

**Breast Cancerous Plasma**

**Normal Plasma**

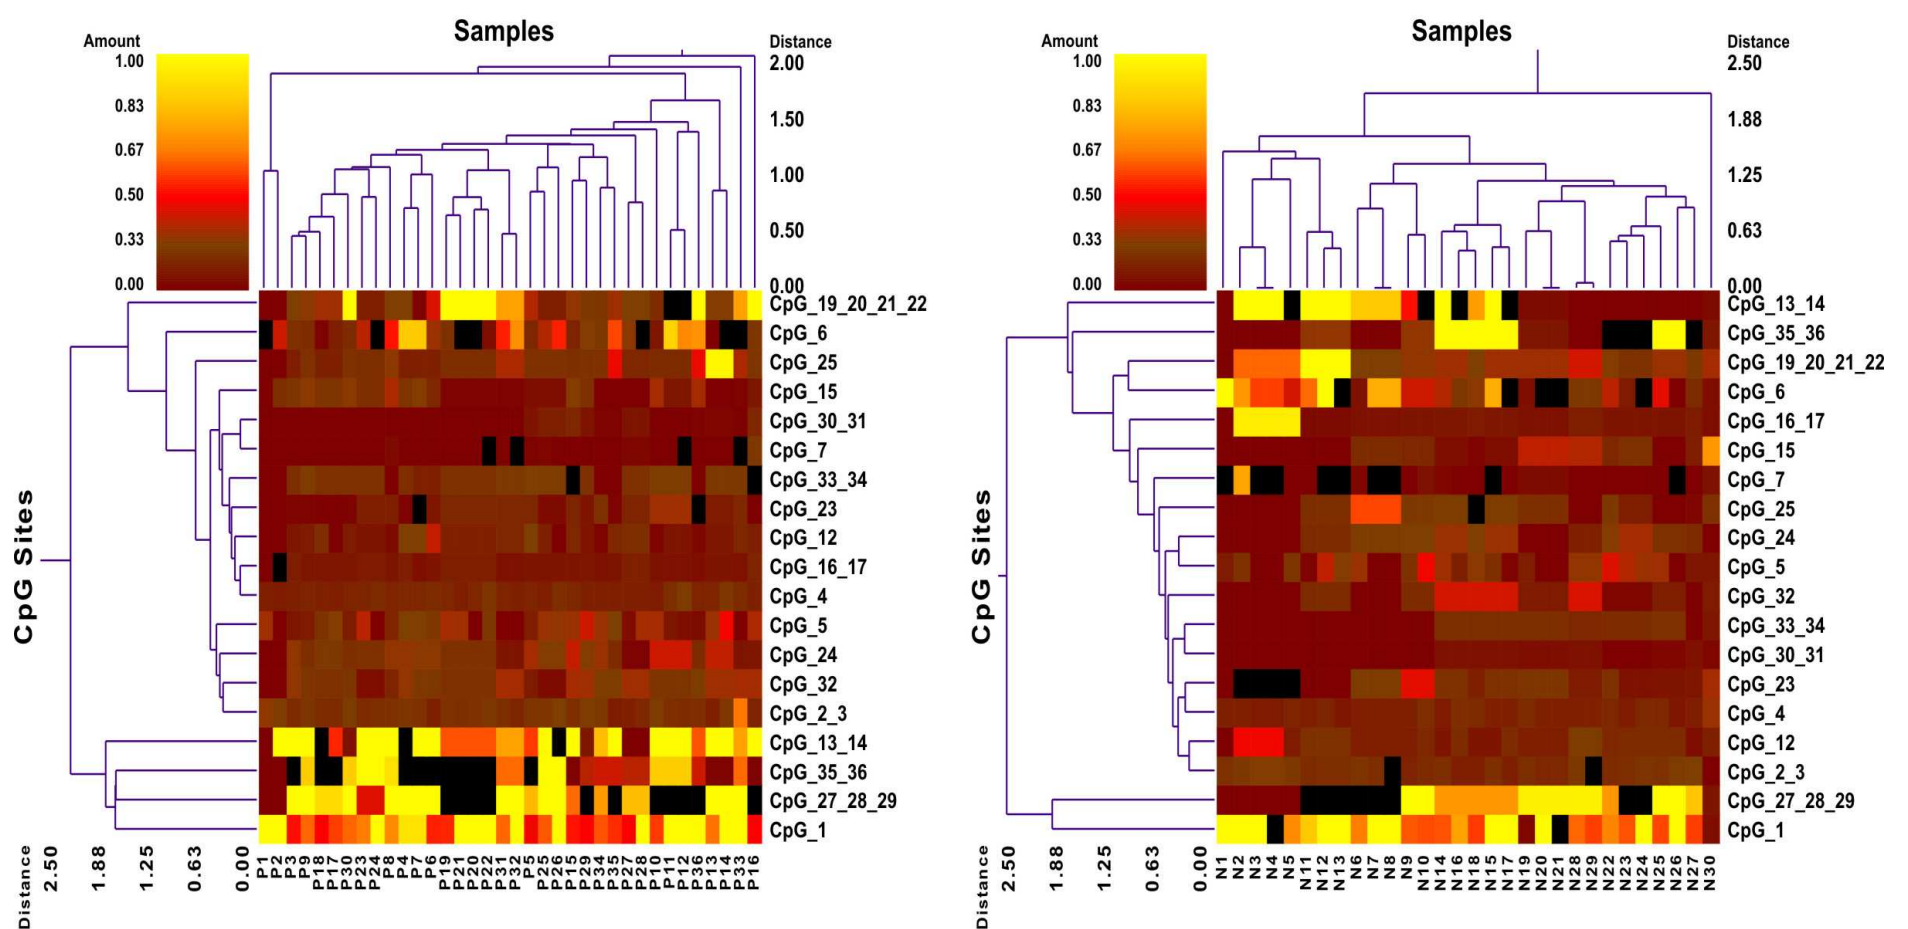

**Double dendrogram of *BMP6* gene:** Two-way hierarchical cluster analysis of 36 plasma samples from breast cancer patients and 30 plasma samples of normal subjects. (Red clusters indicate 0% methylated, yellow clusters indicate 100% methylated, color gradient between red and yellow indicates methylation ranging from 0-100, and black clusters indicate not analyzed CpG sites).

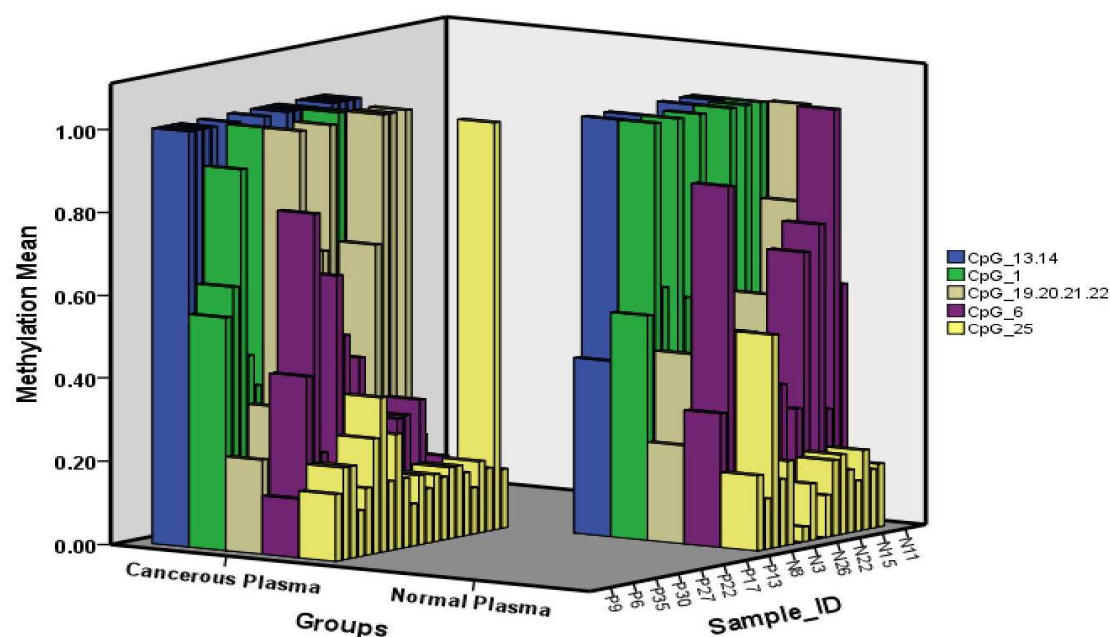

**Comparison of informative CpG sites in two groups of plasma samples.**

### Breast Cancerous Tissue

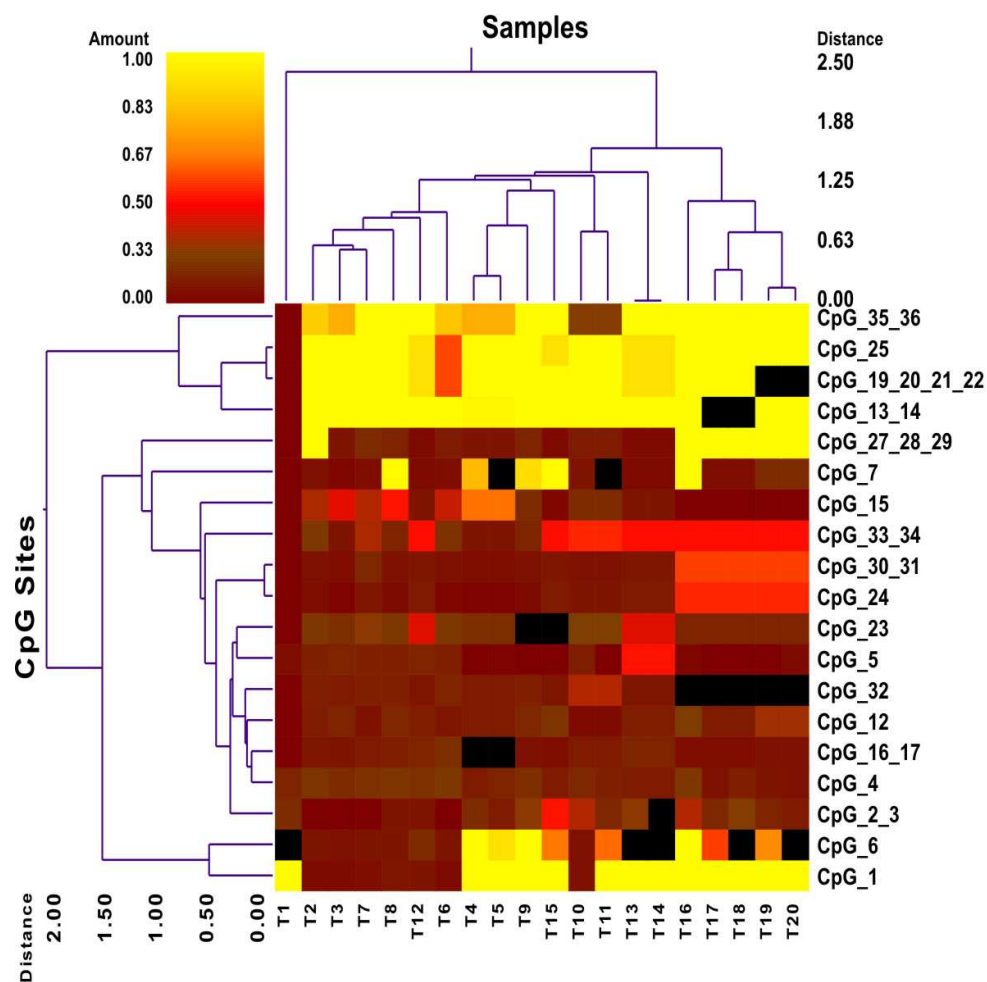

### Breast Cancerous Serum

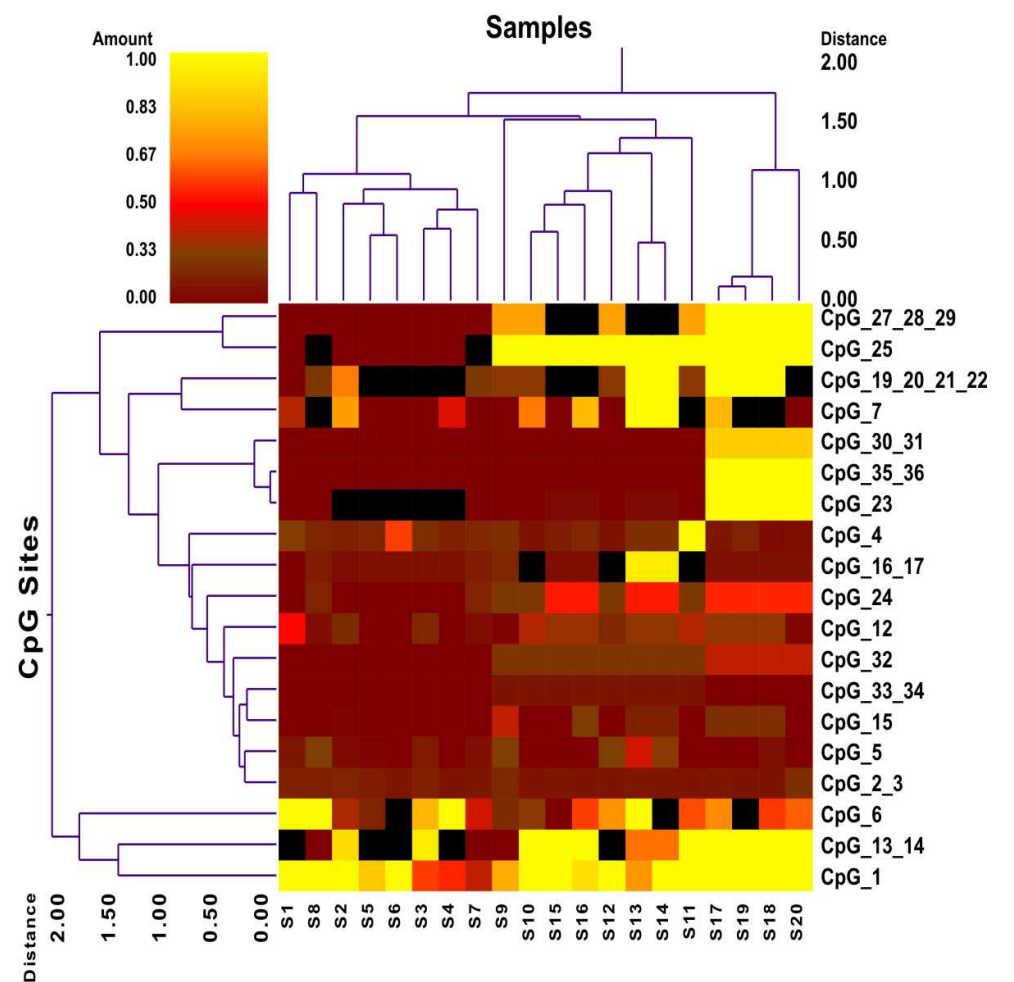

### Adjacent Normal Tissue

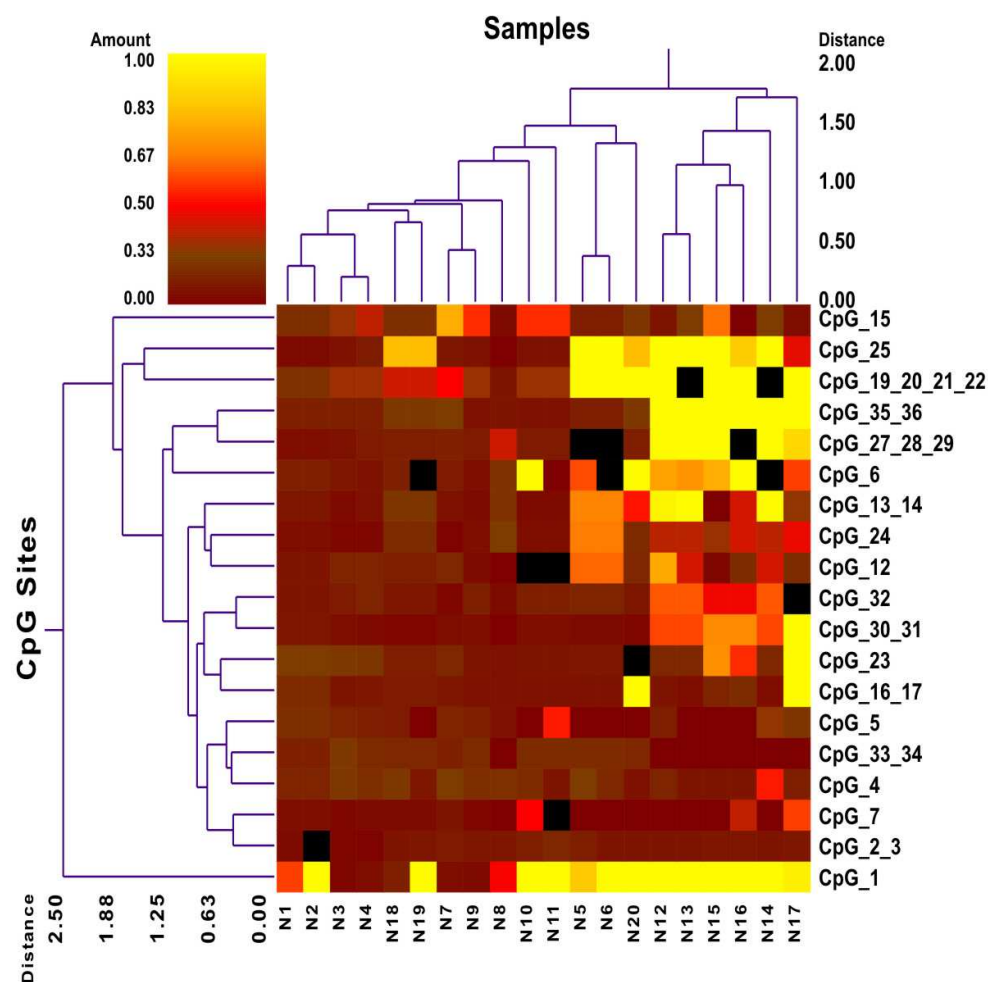

**Double dendrogram of *BMP6* gene:** Two-way hierarchical cluster analysis of 60 triple samples (breast cancerous tissue, matched normal tissue serum and samples) from 20 breast cancer patients. (Red clusters indicate 0% methylated, yellow clusters indicate 100% methylated, color gradient between red and yellow indicates methylation ranging from 0-100, and black clusters indicate not analyzed CpG sites).

**BRCA1 Gene**

| Gene ID | Alternate gene name  | locus | Function                                                                                                                                    | Methylation effect on breast cancer |
|---------|----------------------|-------|---------------------------------------------------------------------------------------------------------------------------------------------|-------------------------------------|
| 672     | Breast Cancer type 1 | 17q21 | Involved in DNA repair, recombination, checkpoint control of the cell cycle and transcription. Interacts with p53, STAT-factors, SRBC, etc. | direct                              |

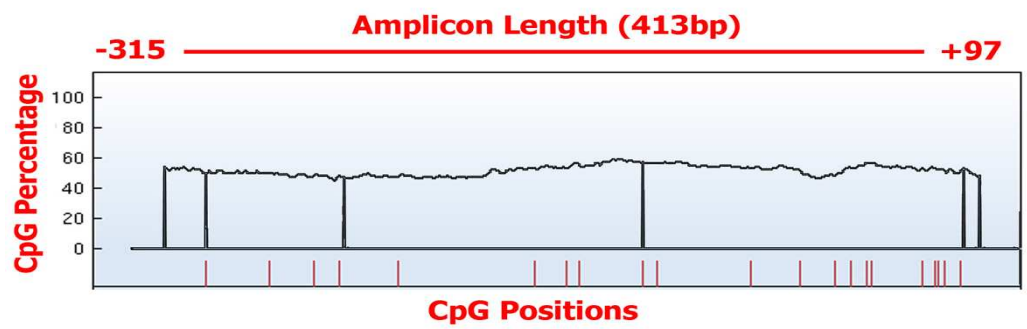

**Breast Cancerous Plasma**

**Normal Plasma**

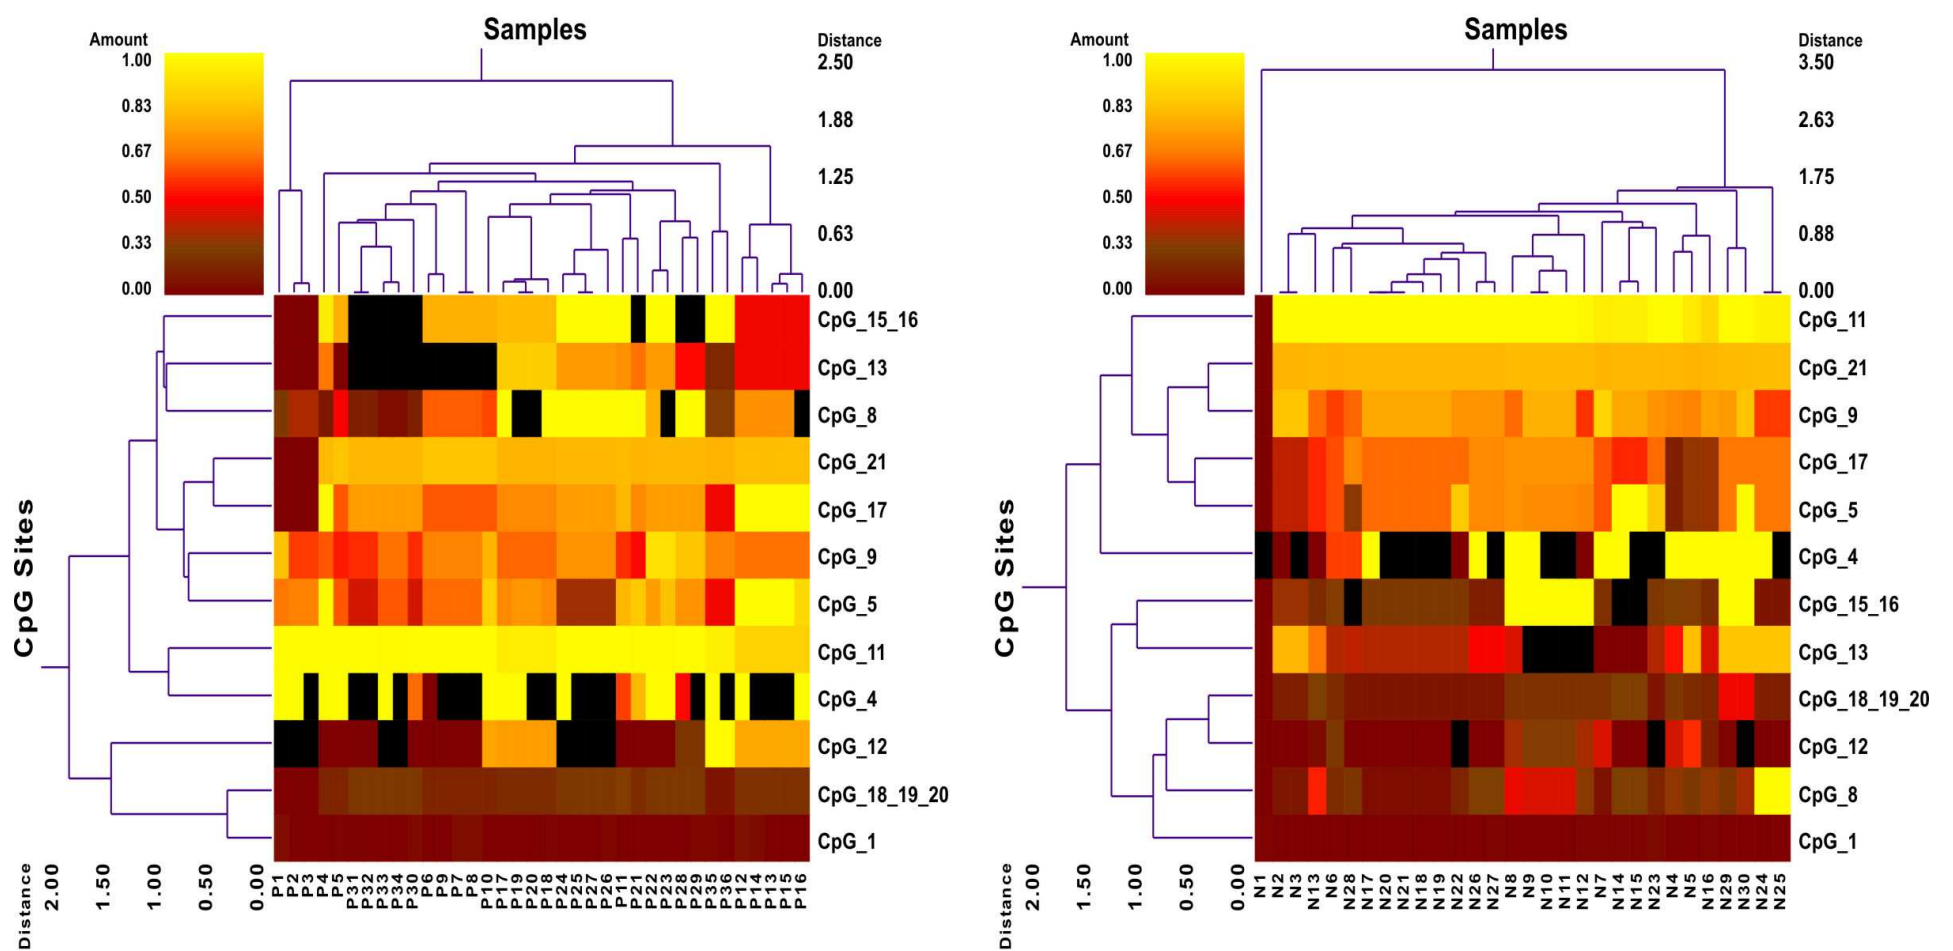

**Double dendrogram of BRCA1 gene:** Two-way hierarchical cluster analysis of 36 plasma samples from breast cancer patients and 30 plasma samples of normal subjects. (Red clusters indicate 0% methylated, yellow clusters indicate 100% methylated, color gradient between red and yellow indicates methylation ranging from 0-100, and black clusters indicate not analyzed CpG sites).

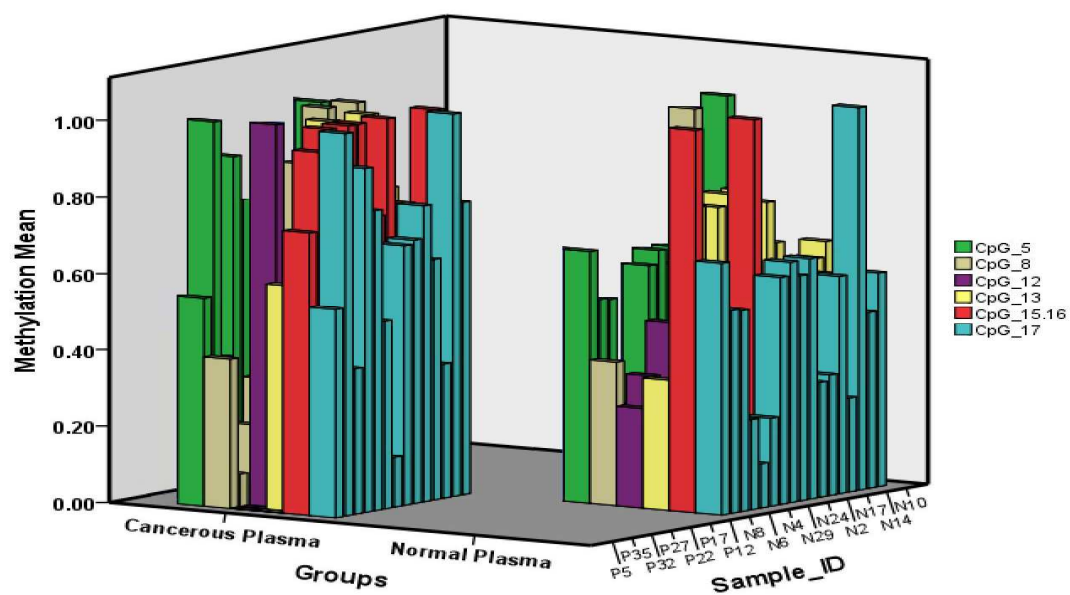

**Comparison of informative CpG sites in two groups of plasma samples.**

### Breast Cancerous Tissue

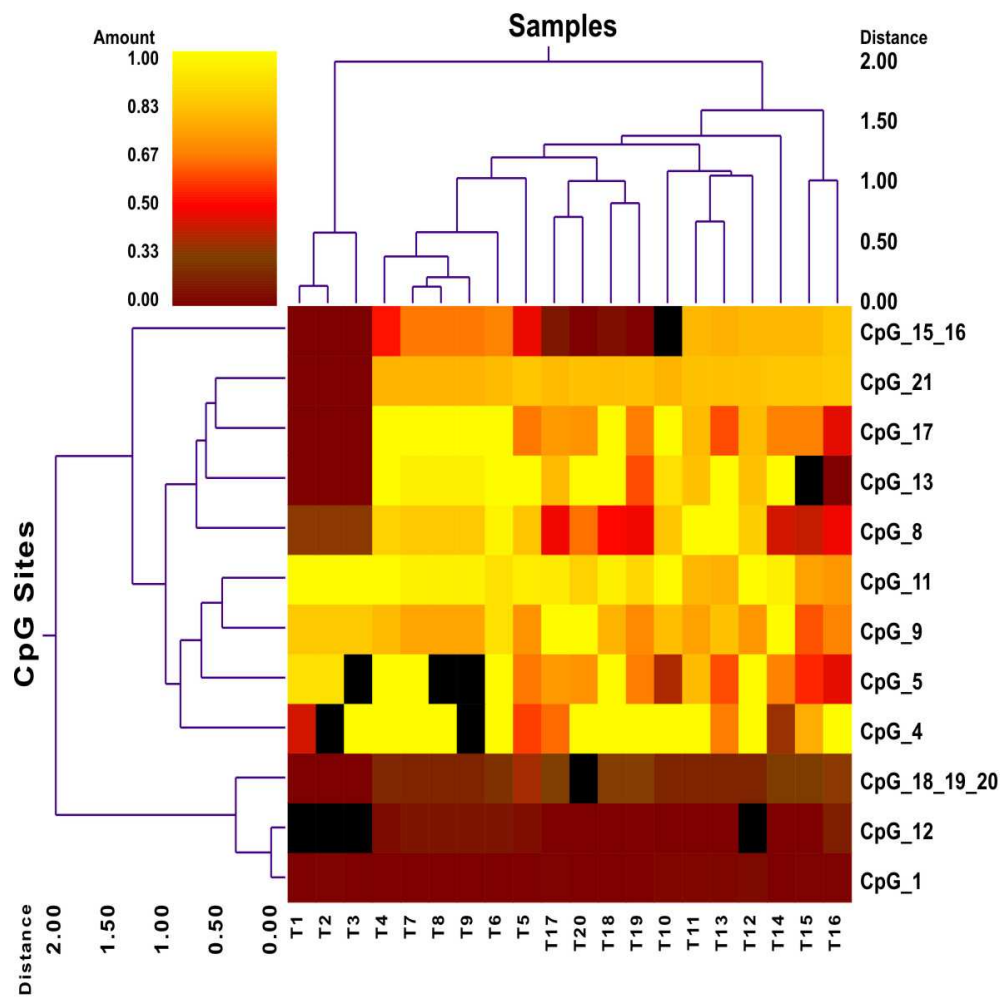

### Breast Cancerous Serum

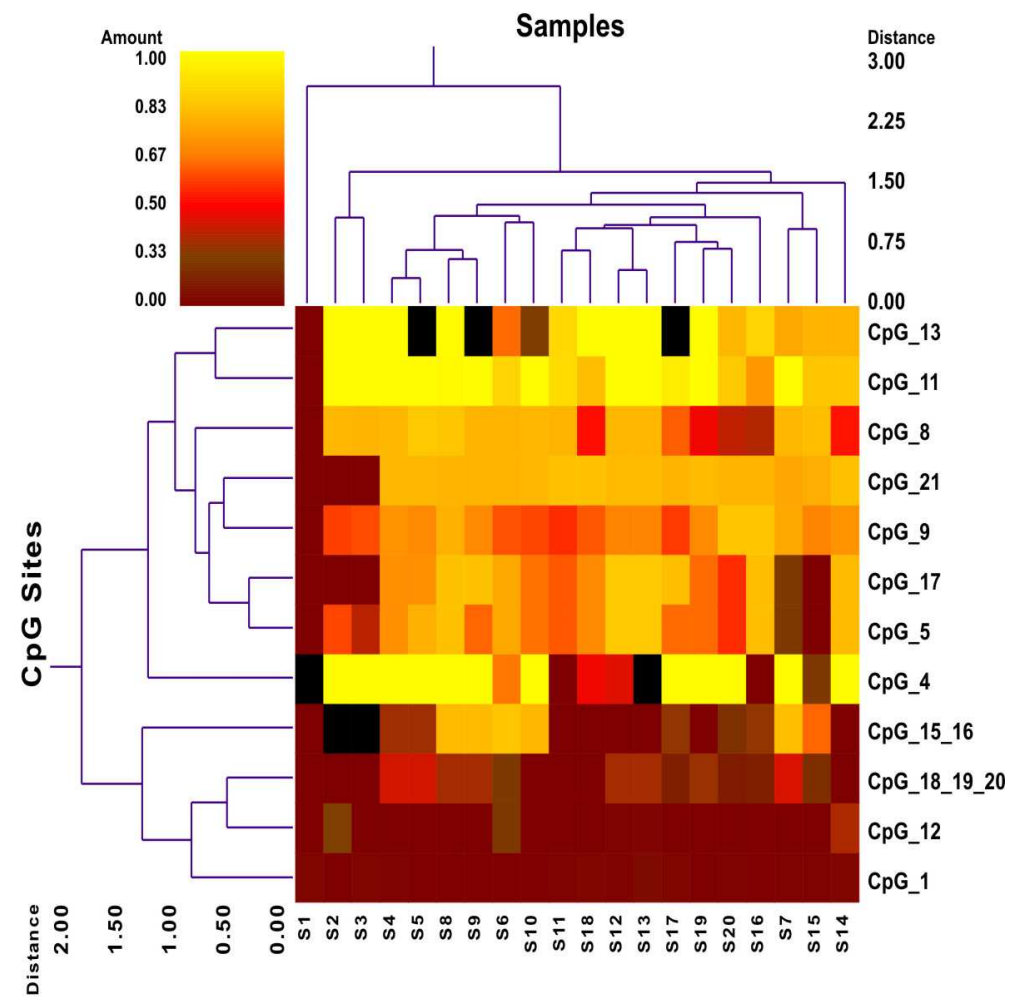

### Adjacent Normal Tissue

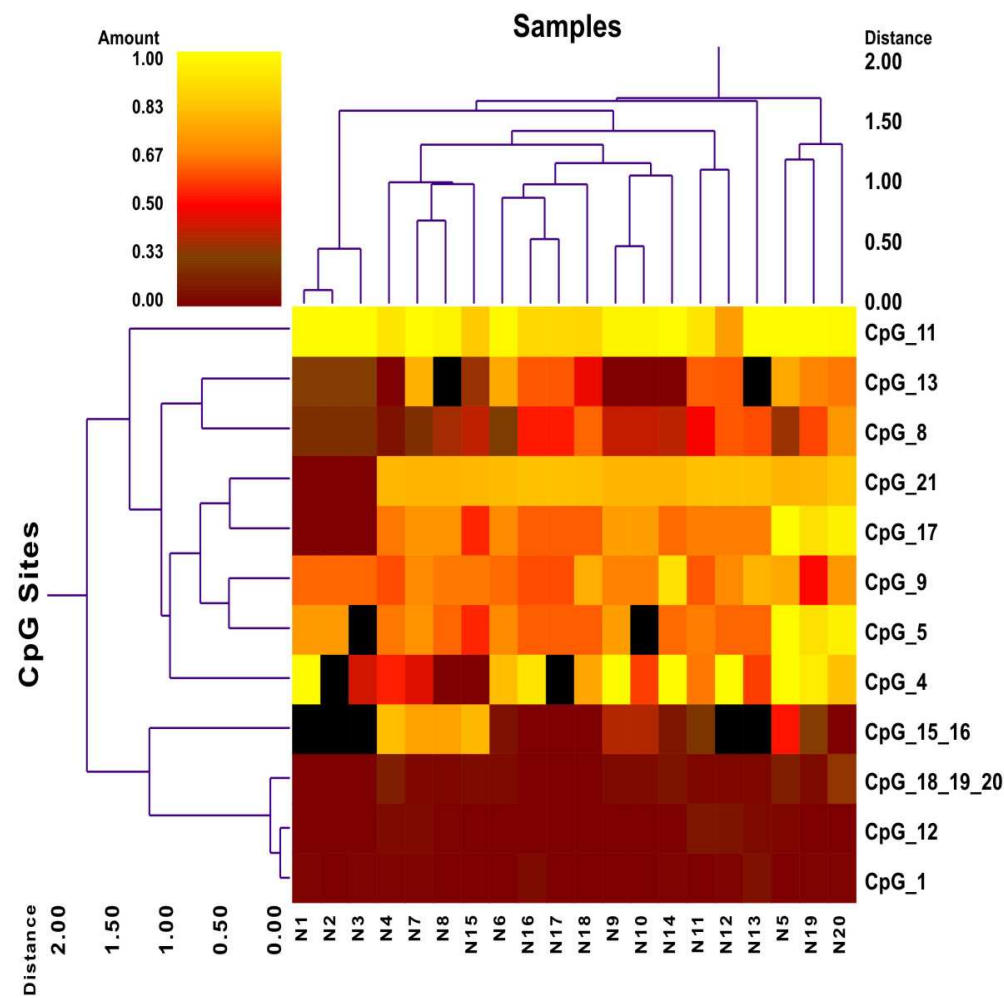

**Double dendrogram of *BRCA1* gene:** Two-way hierarchical cluster analysis of 60 triple samples (breast cancerous tissue, matched normal tissue serum and samples) from 20 breast cancer patients. (Red clusters indicate 0% methylated, yellow clusters indicate 100% methylated, color gradient between red and yellow indicates methylation ranging from 0-100, and black clusters indicate not analyzed CpG sites).



**CST6 Gene**

| Gene ID | Alternate gene name | locus | Function                                                                                                                                                                                                                                                    | Methylation effect on breast cancer |
|---------|---------------------|-------|-------------------------------------------------------------------------------------------------------------------------------------------------------------------------------------------------------------------------------------------------------------|-------------------------------------|
| 1474    | Cystatin E/M        | 11q13 | This gene encodes a cystatin from type 2 family, which is down-regulated in metastatic breast tumour cells as compared to primary tumour cells. Loss of expression is likely associated with the progression of a primary tumour to a metastatic phenotype. | direct                              |

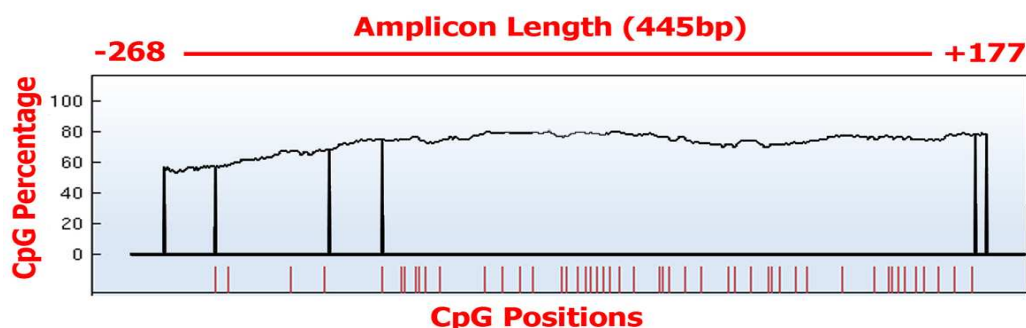

**Breast Cancerous Plasma**

**Normal Plasma**

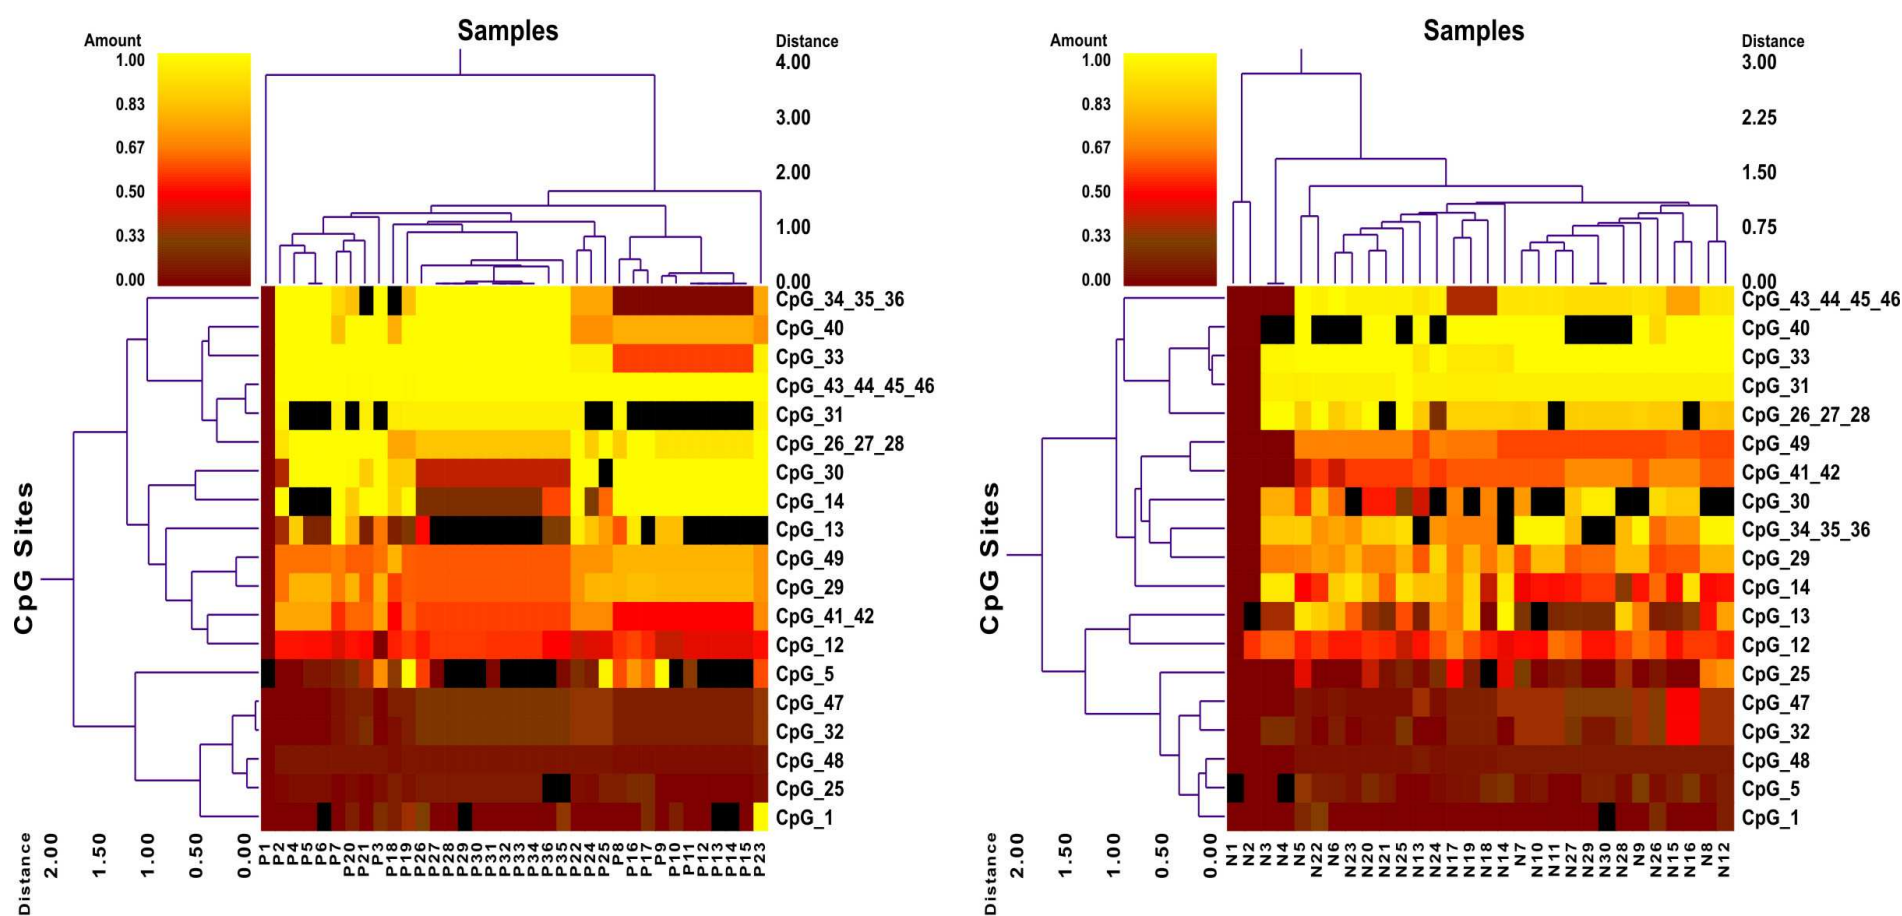

**Double dendrogram of *CST6* gene:** Two-way hierarchical cluster analysis of 36 plasma samples from breast cancer patients and 30 plasma samples of normal subjects. (Red clusters indicate 0% methylated, yellow clusters indicate 100% methylated, color gradient between red and yellow indicates methylation ranging from 0-100, and black clusters indicate not analyzed CpG sites).

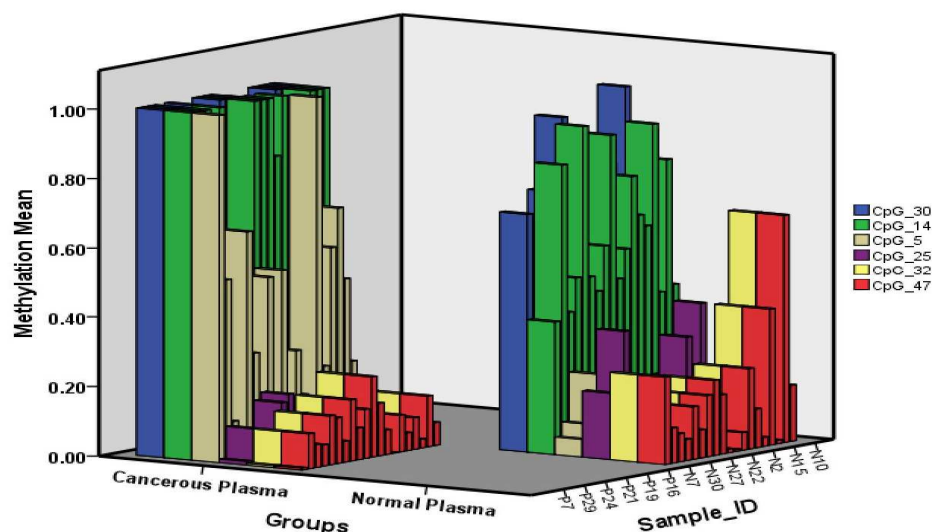

**Comparison of informative CpG sites in two groups of plasma samples.**

### Breast Cancerous Tissue

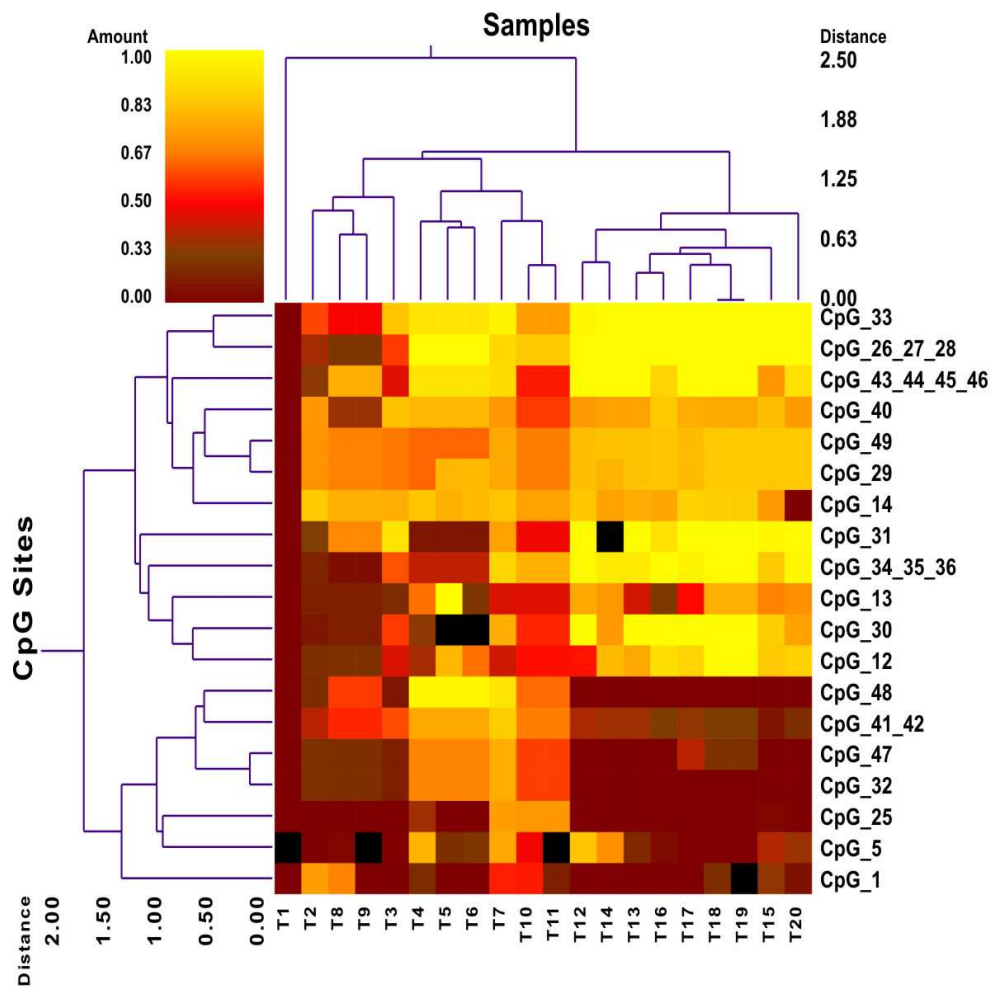

### Breast Cancerous Serum

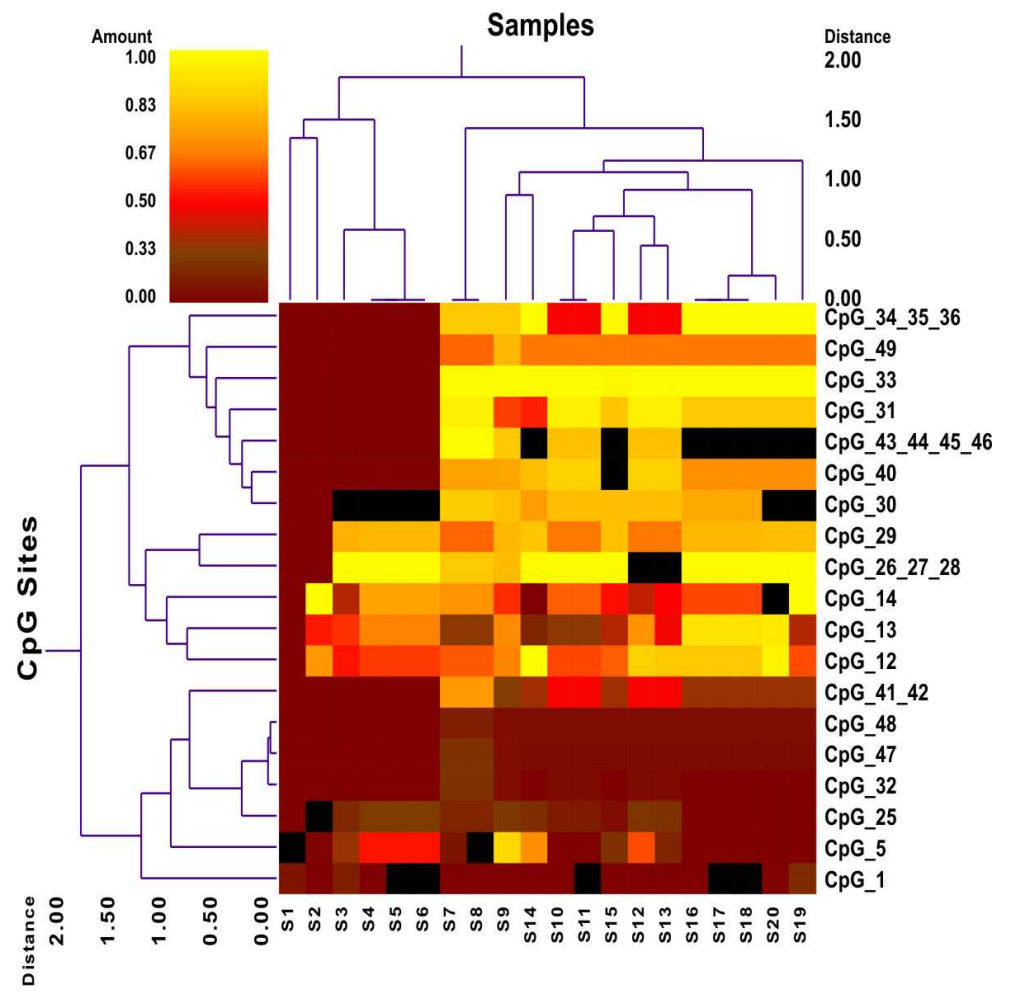

### Adjacent Normal Tissue

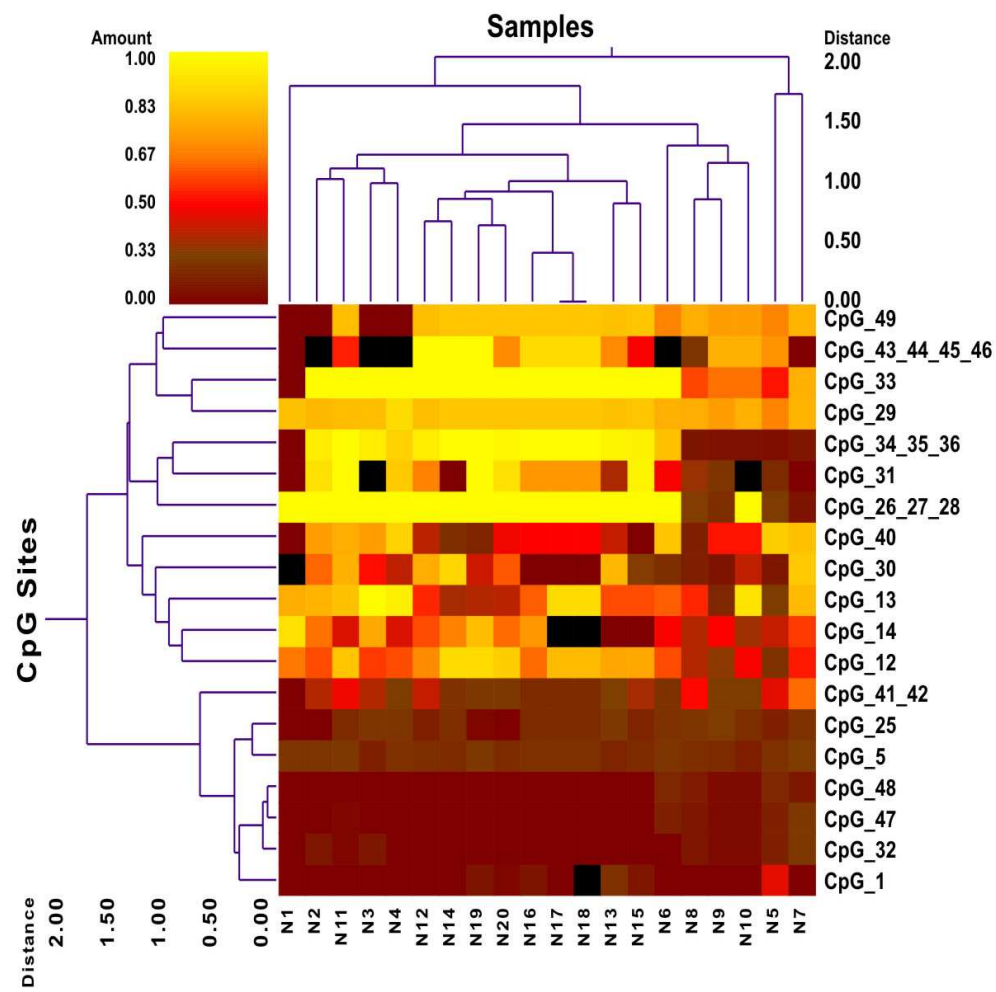

**Double dendrogram of *CST6* gene:** Two-way hierarchical cluster analysis of 60 triple samples (breast cancerous tissue, matched normal tissue serum and samples) from 20 breast cancer patients. (Red clusters indicate 0% methylated, yellow clusters indicate 100% methylated, color gradient between red and yellow indicates methylation ranging from 0-100, and black clusters indicate not analyzed CpG sites).

**ESR-b Gene**

| Gene ID | Alternate gene name           | locus   | Function                                                         | Methylation effect on breast cancer |
|---------|-------------------------------|---------|------------------------------------------------------------------|-------------------------------------|
| 2100    | estrogen receptor 2 (ER beta) | 14q23.2 | Regulation of cell proliferation, predictor of endocrine therapy | direct                              |

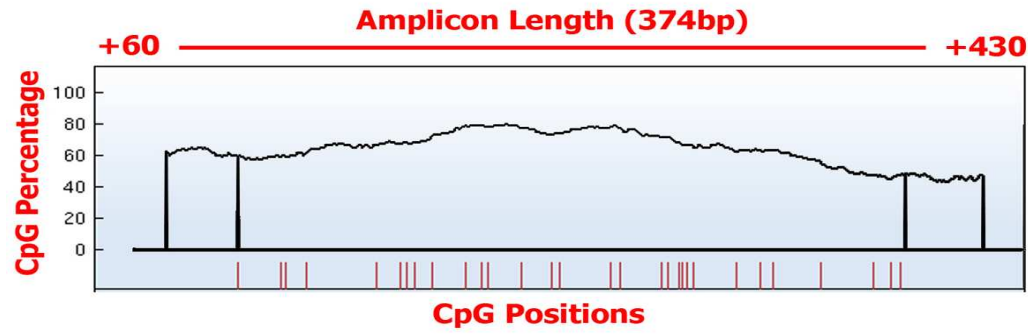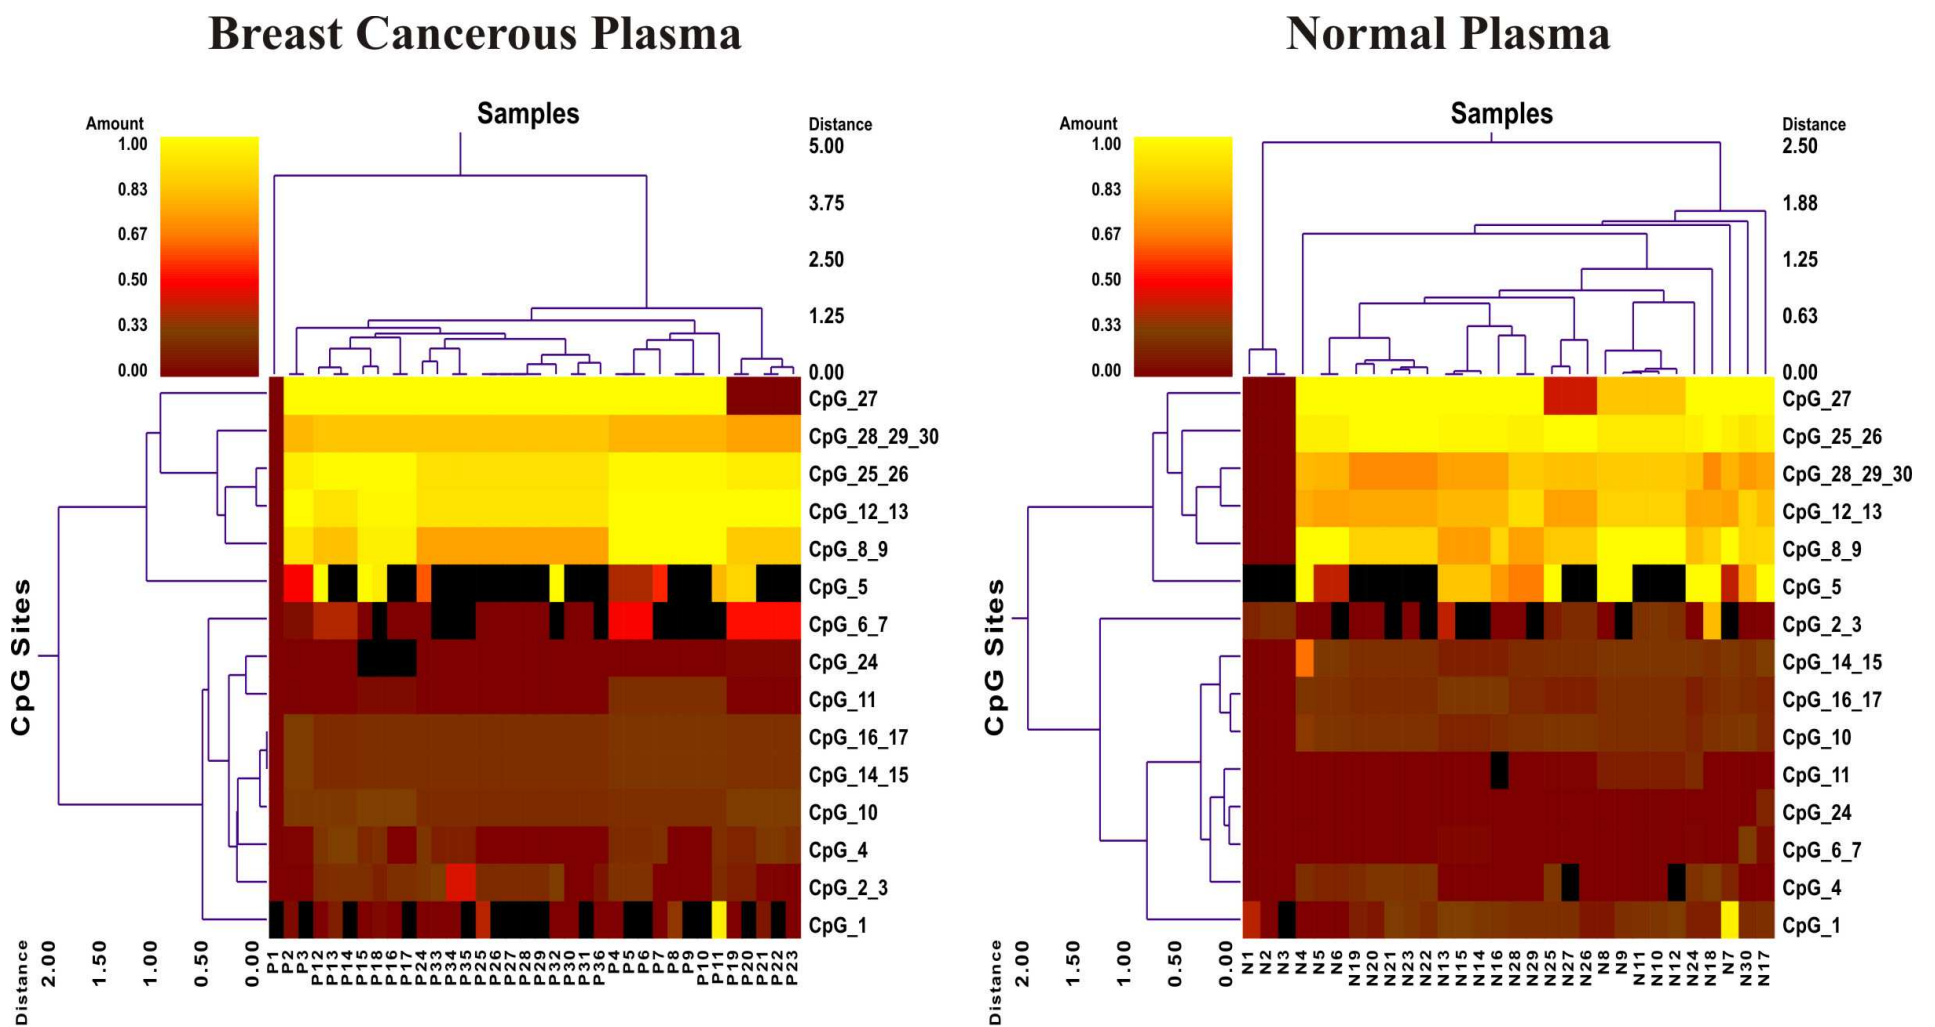

**Double dendrogram of *ESR-b* gene:** Two-way hierarchical cluster analysis of 36 plasma samples from breast cancer patients and 30 plasma samples of normal subjects. (Red clusters indicate 0% methylated, yellow clusters indicate 100% methylated, color gradient between red and yellow indicates methylation ranging from 0-100, and black clusters indicate not analyzed CpG sites).

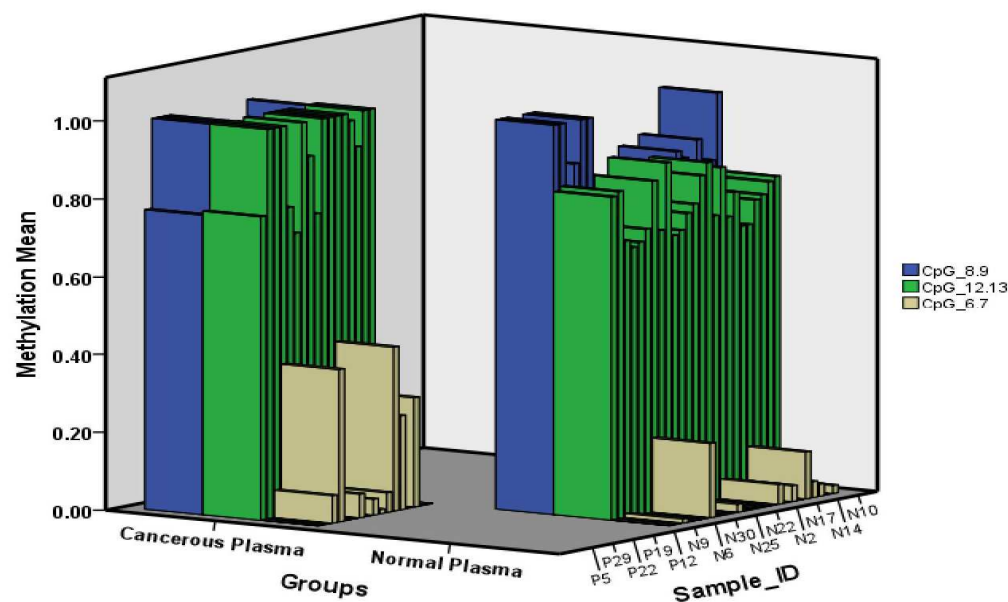

**Comparison of informative CpG sites in two groups of plasma samples.**

### Breast Cancerous Tissue

### Breast Cancerous Serum

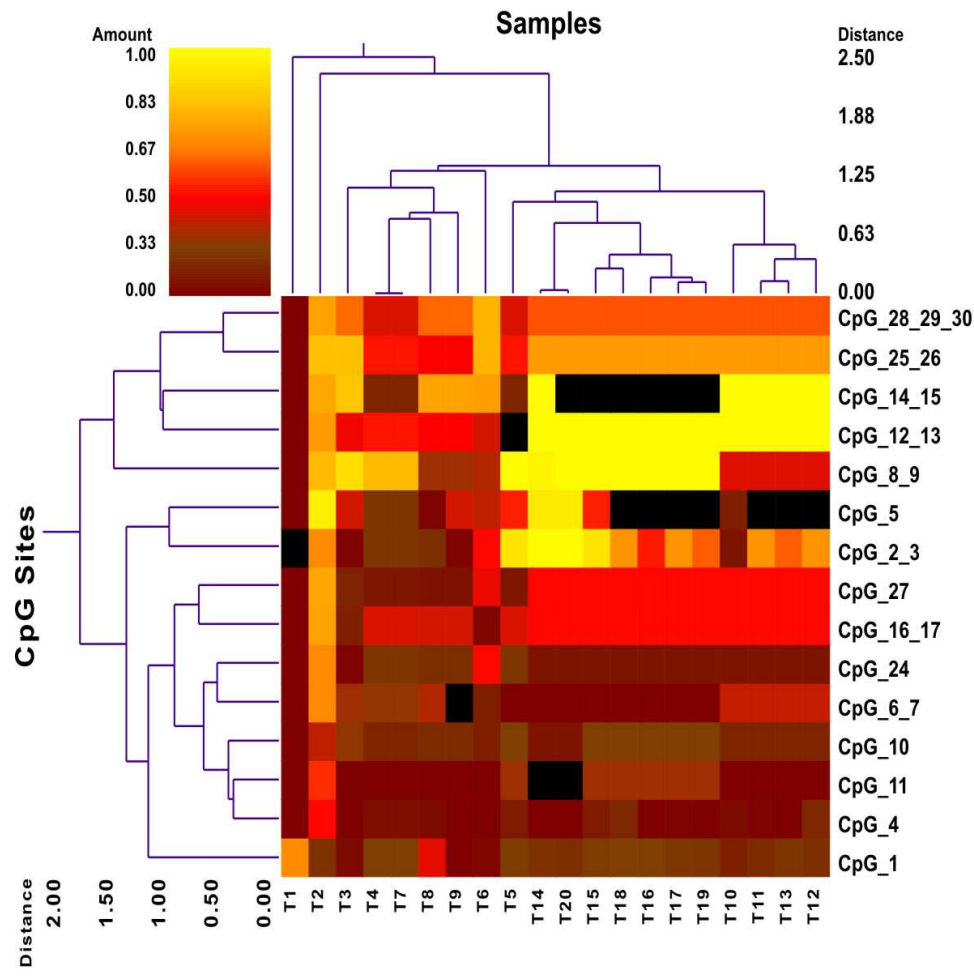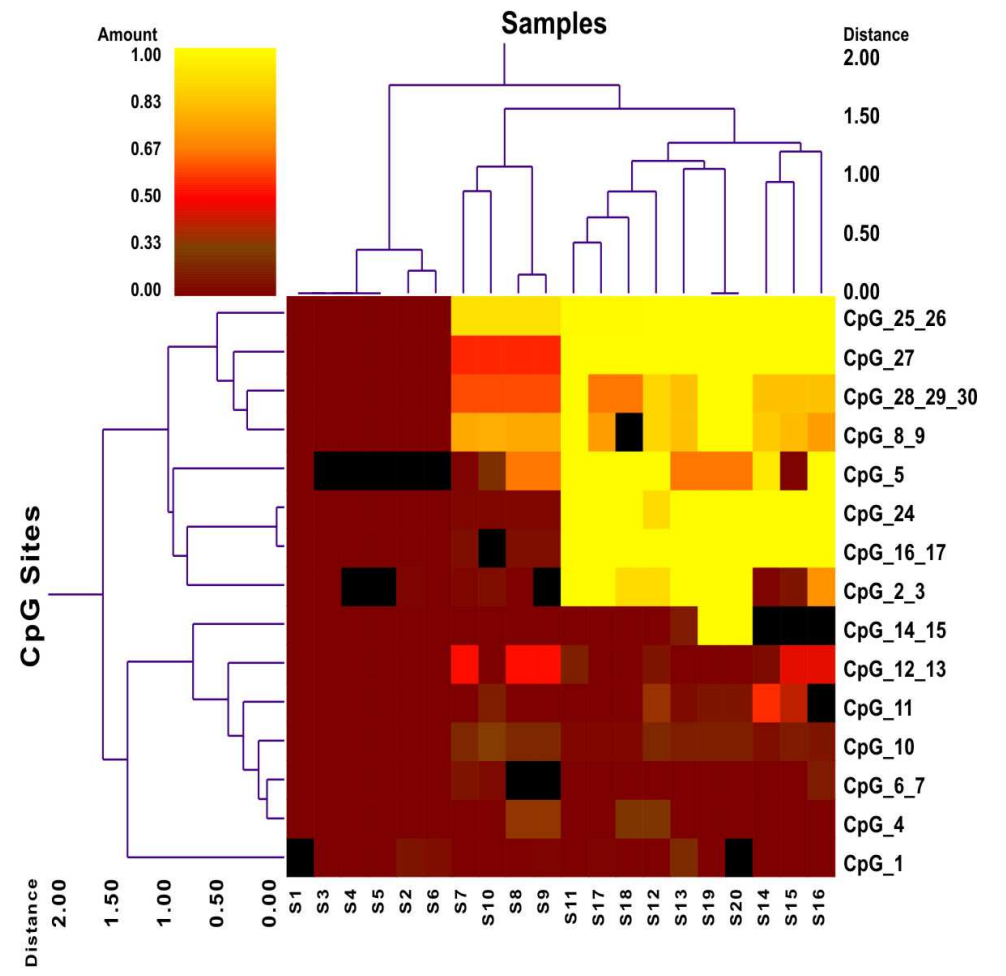

### Adjacent Normal Tissue

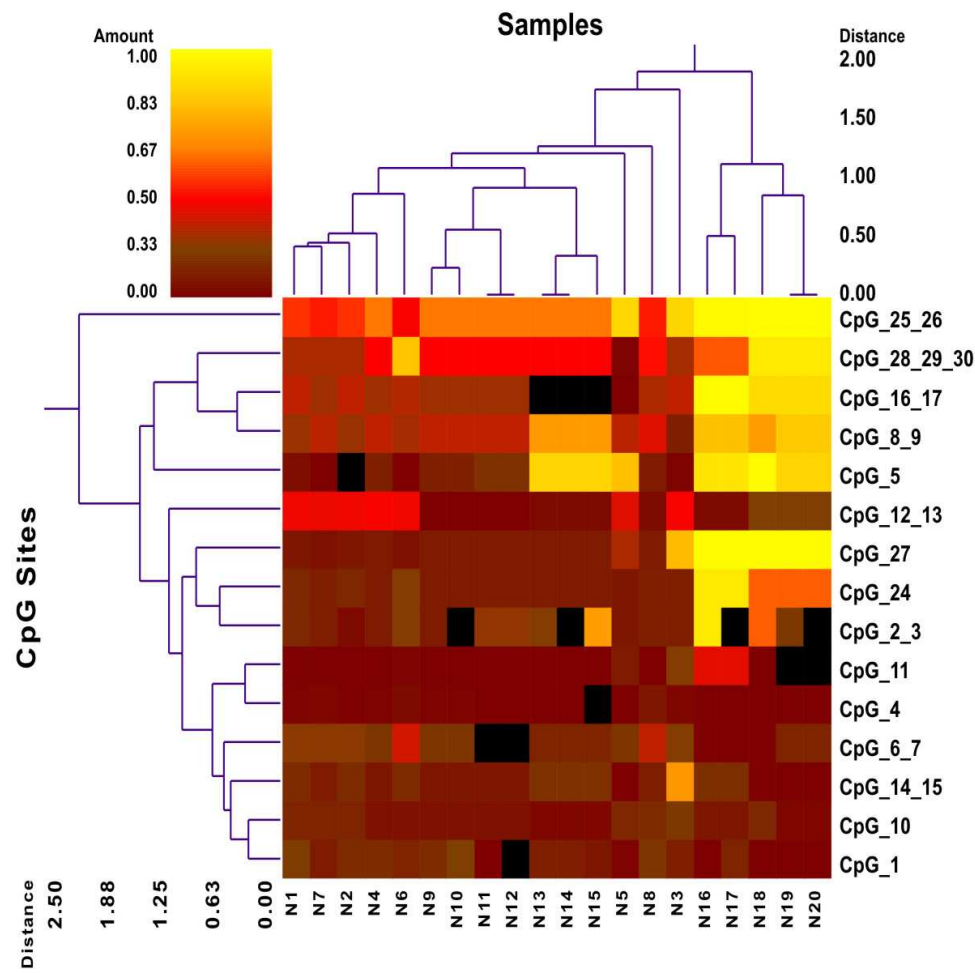

**Double dendrogram of *ESR-b* gene:** Two-way hierarchical cluster analysis of 60 triple samples (breast cancerous tissue, matched normal tissue serum and samples) from 20 breast cancer patients. (Red clusters indicate 0% methylated, yellow clusters indicate 100% methylated, color gradient between red and yellow indicates methylation ranging from 0-100, and black clusters indicate not analyzed CpG sites).

**GSTP1 Gene**

| Gene ID | Alternate gene name          | locus | Function                                                                                                                                                                                                                                     | Methylation effect on breast cancer |
|---------|------------------------------|-------|----------------------------------------------------------------------------------------------------------------------------------------------------------------------------------------------------------------------------------------------|-------------------------------------|
| 2950    | Glutathione S-transferase P1 | 11q13 | Carcinogen detoxification. GSTP1 is a polymorphic gene encoding active, functionally different GSTP1 variant proteins that are thought to function in xenobiotic metabolism and play a role in susceptibility to cancer, and other diseases. | direct                              |

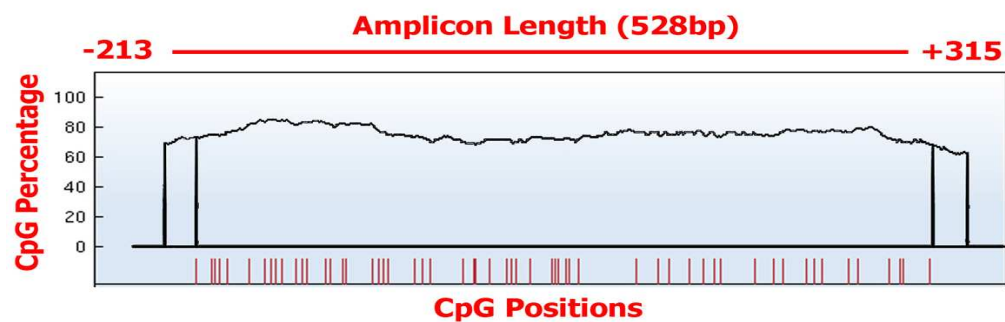

**Breast Cancerous Plasma**

**Normal Plasma**

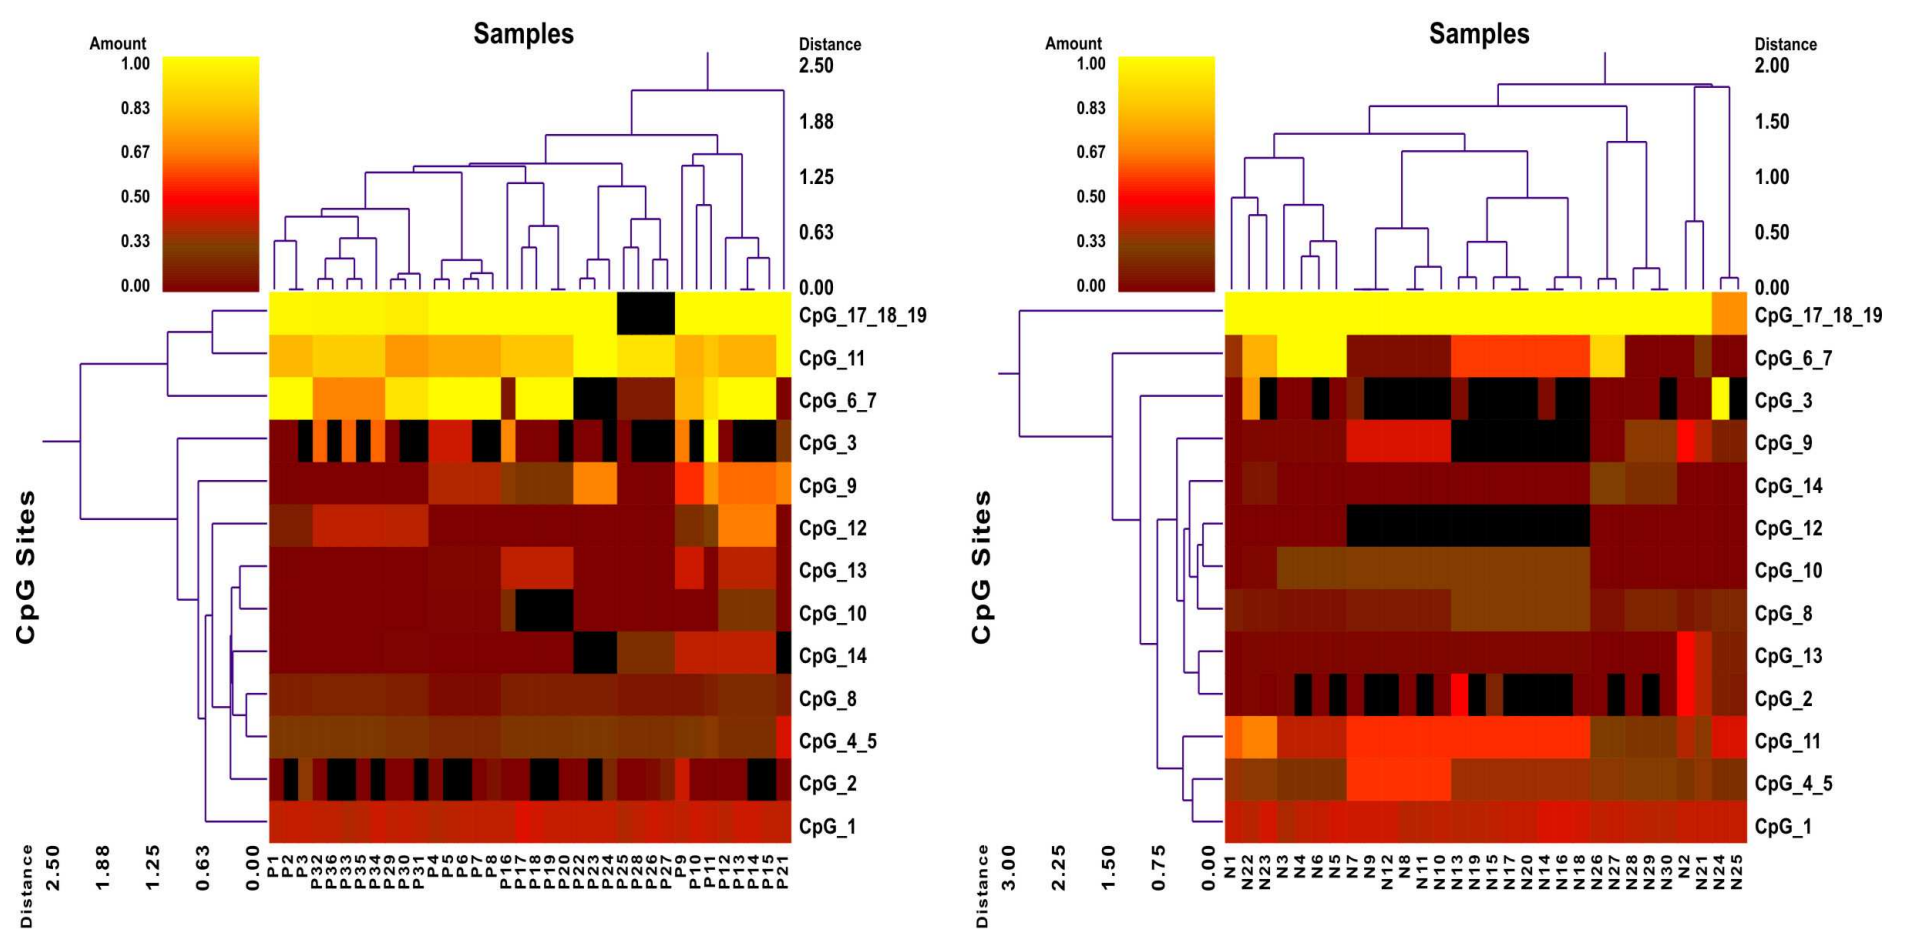

**Double dendrogram of GSTP1 gene:** Two-way hierarchical cluster analysis of 36 plasma samples from breast cancer patients and 30 plasma samples of normal subjects. (Red clusters indicate 0% methylated, yellow clusters indicate 100% methylated, color gradient between red and yellow indicates methylation ranging from 0-100, and black clusters indicate not analyzed CpG sites).

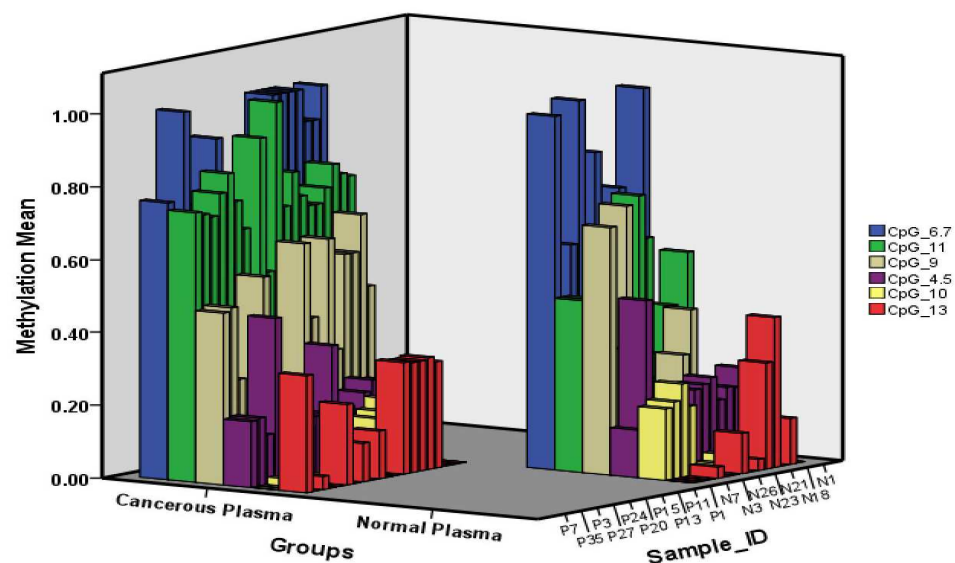

**Comparison of informative CpG sites in two groups of plasma samples.**

### Breast Cancerous Tissue

### Breast Cancerous Serum

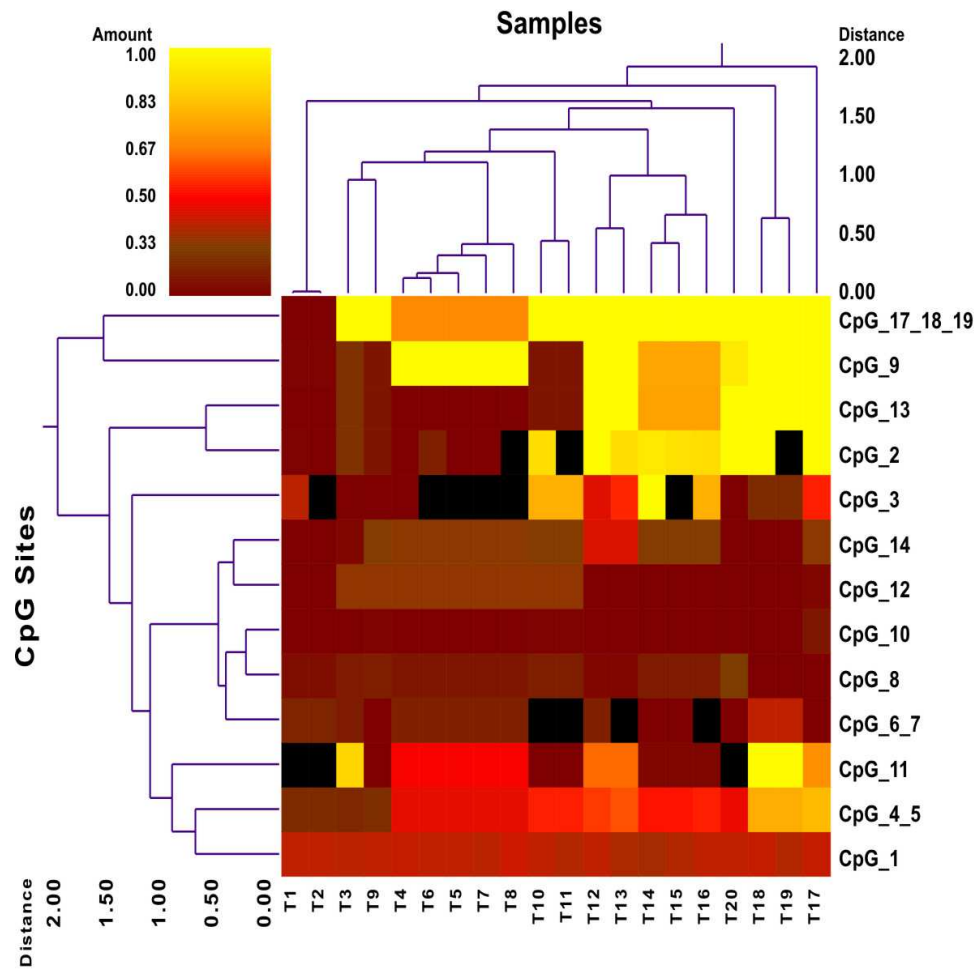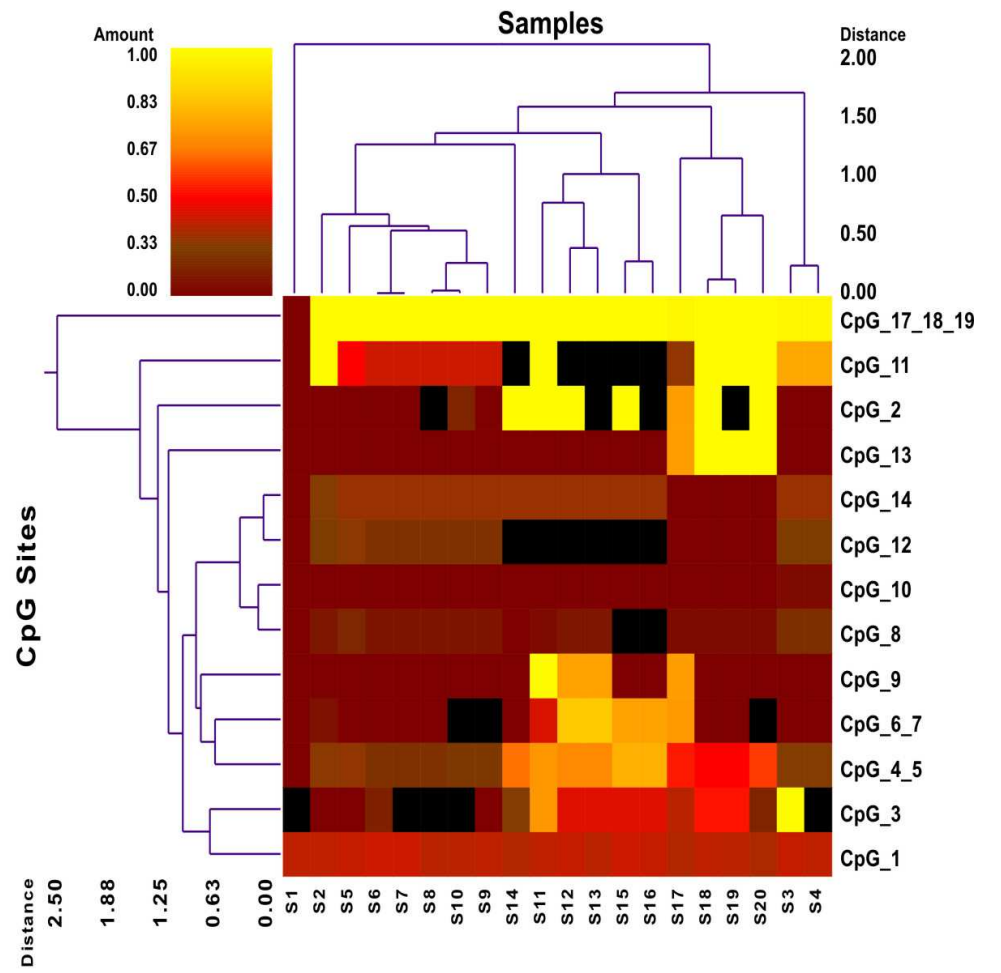

### Adjacent Normal Tissue

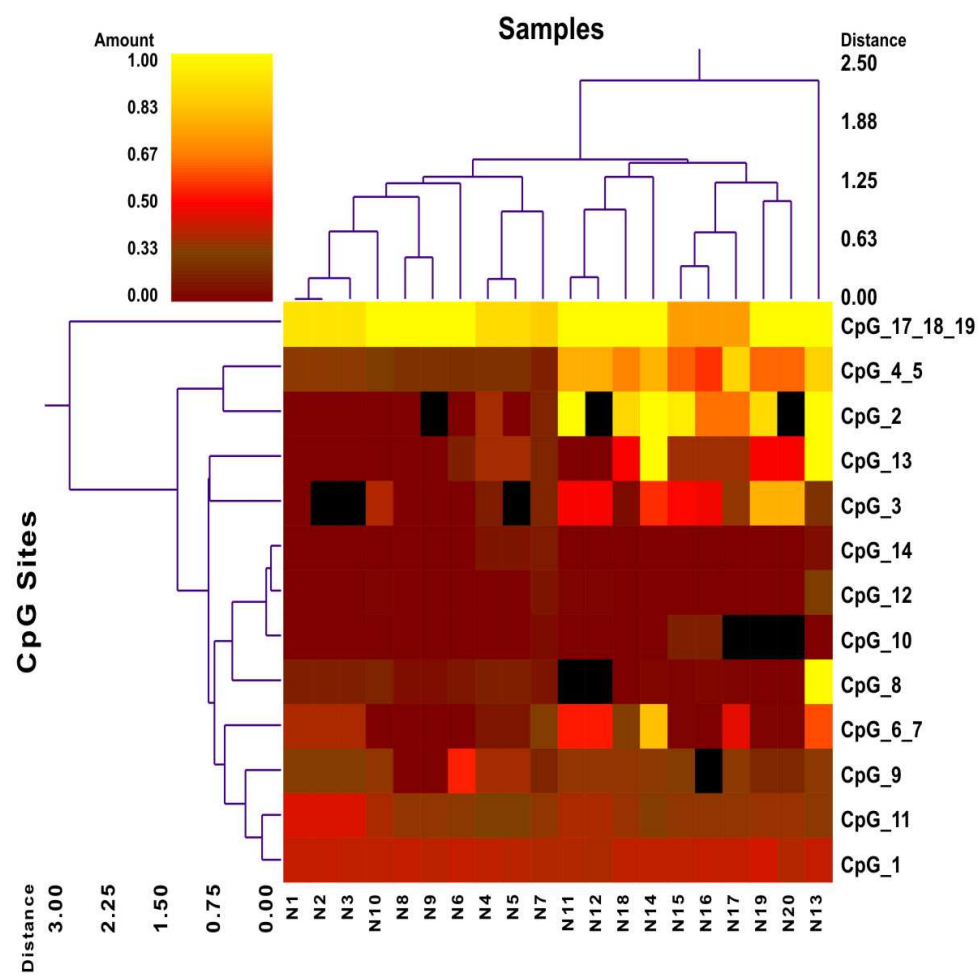

**Double dendrogram of *GSTP1* gene:** Two-way hierarchical cluster analysis of 60 triple samples (breast cancerous tissue, matched normal tissue serum and samples) from 20 breast cancer patients. (Red clusters indicate 0% methylated, yellow clusters indicate 100% methylated, color gradient between red and yellow indicates methylation ranging from 0-100, and black clusters indicate not analyzed CpG sites).

**P16 (CDKN2A) Gene**

| Gene ID | Alternate gene name                                                 | locus | Function                                       | Methylation effect on breast cancer |
|---------|---------------------------------------------------------------------|-------|------------------------------------------------|-------------------------------------|
| 1029    | Cyclin-dependent kinase inhibitor 2A (melanoma, p16, inhibits CDK4) | 9p21  | Cell cycle regulation, involved in senescence. | direct                              |

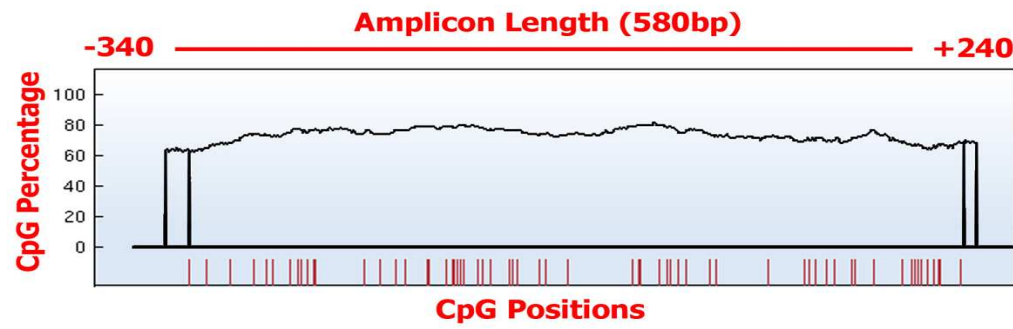

**Breast Cancerous Plasma**

**Normal Plasma**

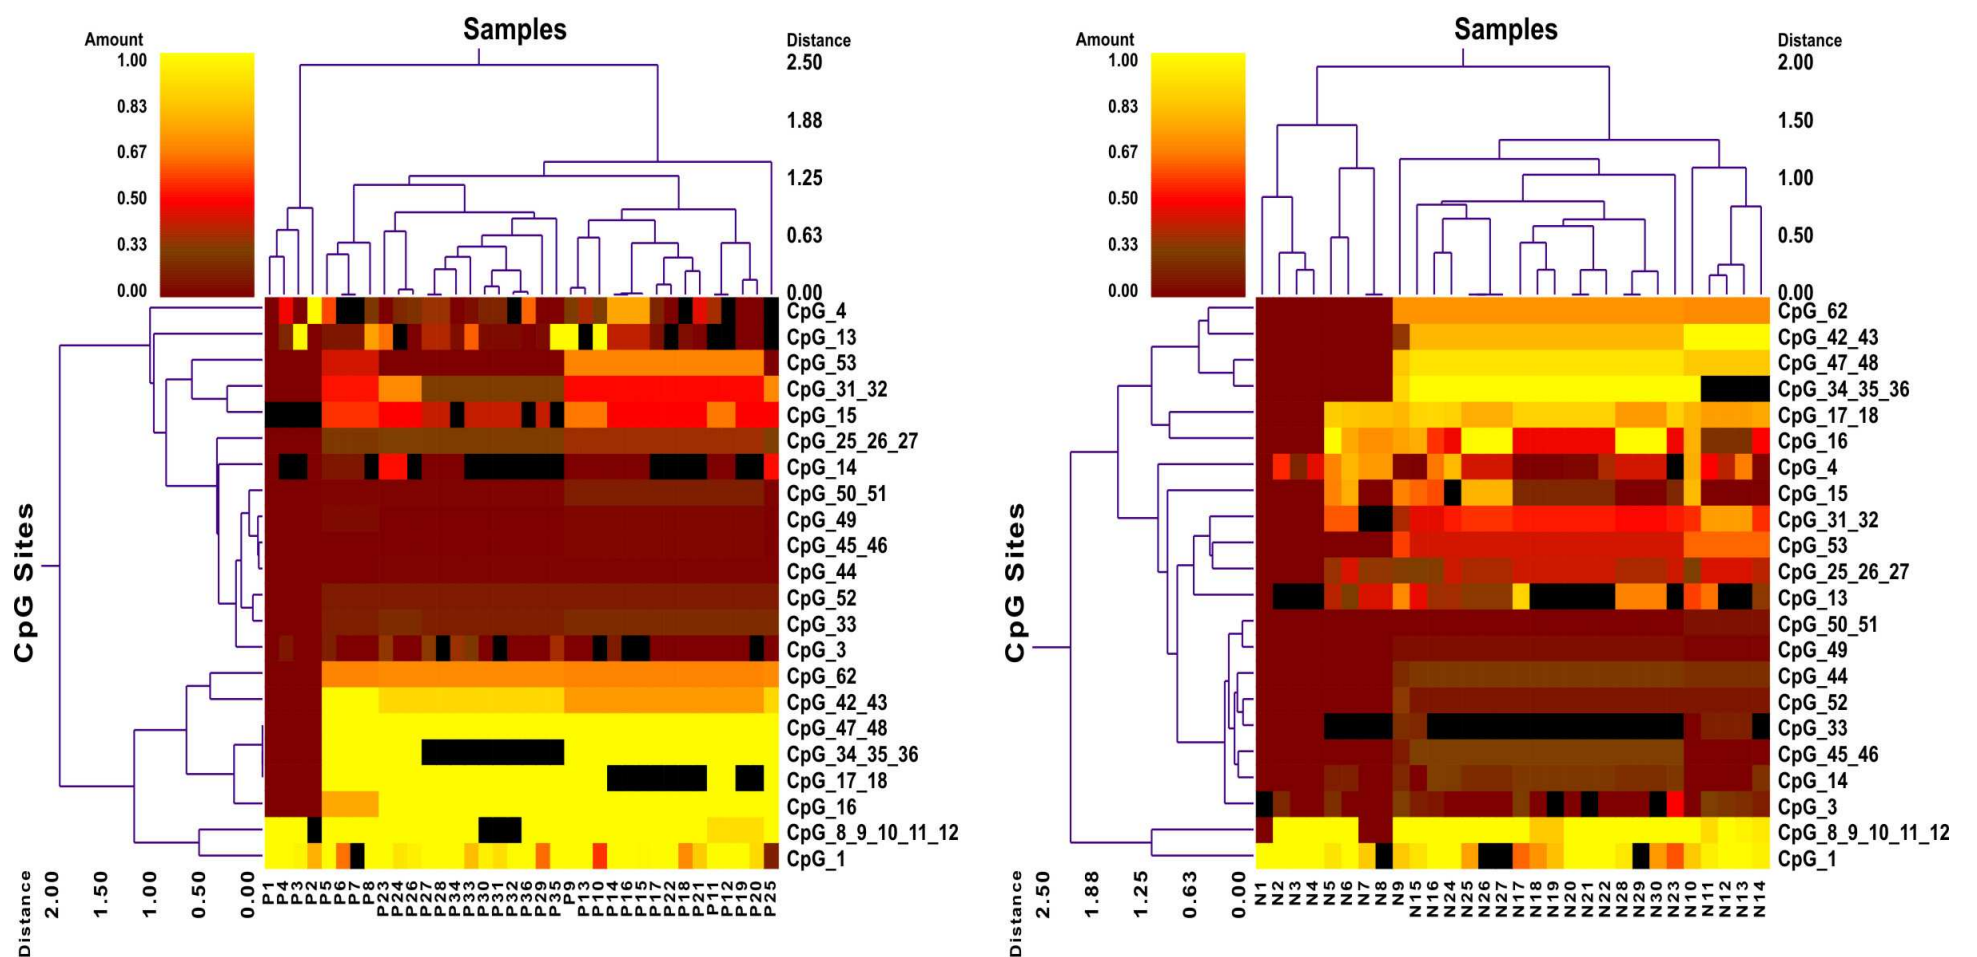

**Double dendrogram of P16 gene:** Two-way hierarchical cluster analysis of 36 plasma samples from breast cancer patients and 30 plasma samples of normal subjects. (Red clusters indicate 0% methylated, yellow clusters indicate 100% methylated, color gradient between red and yellow indicates methylation ranging from 0-100, and black clusters indicate not analyzed CpG sites).

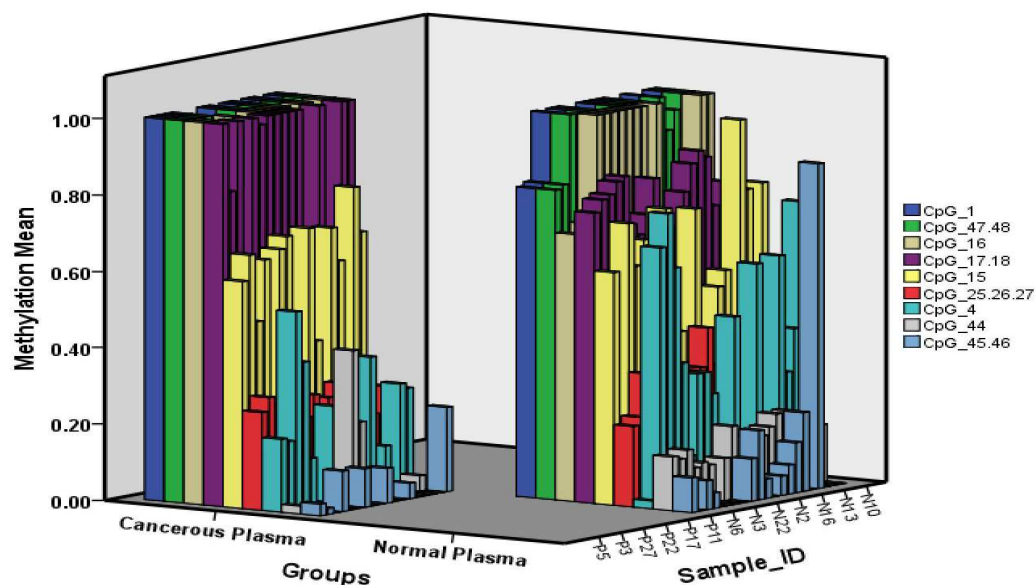

**Comparison of informative CpG sites in two groups of plasma samples.**

### Breast Cancerous Tissue

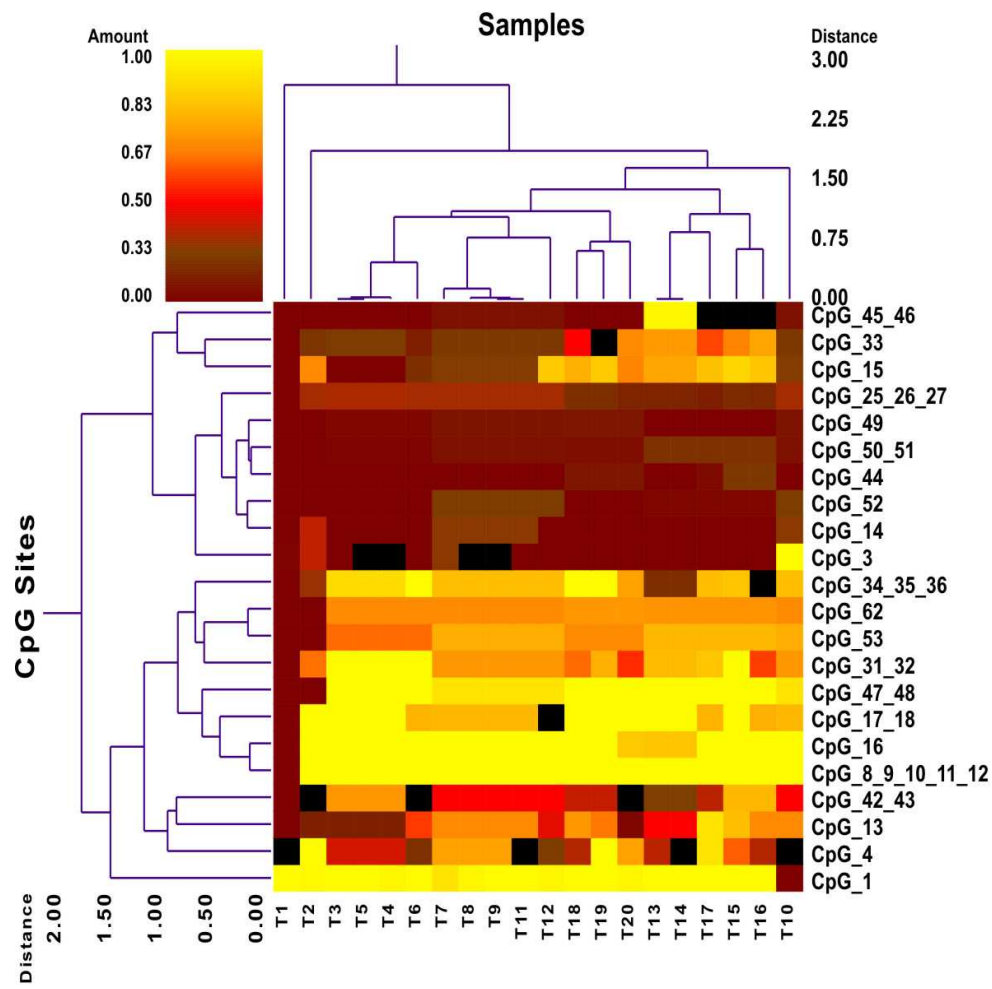

### Breast Cancerous Serum

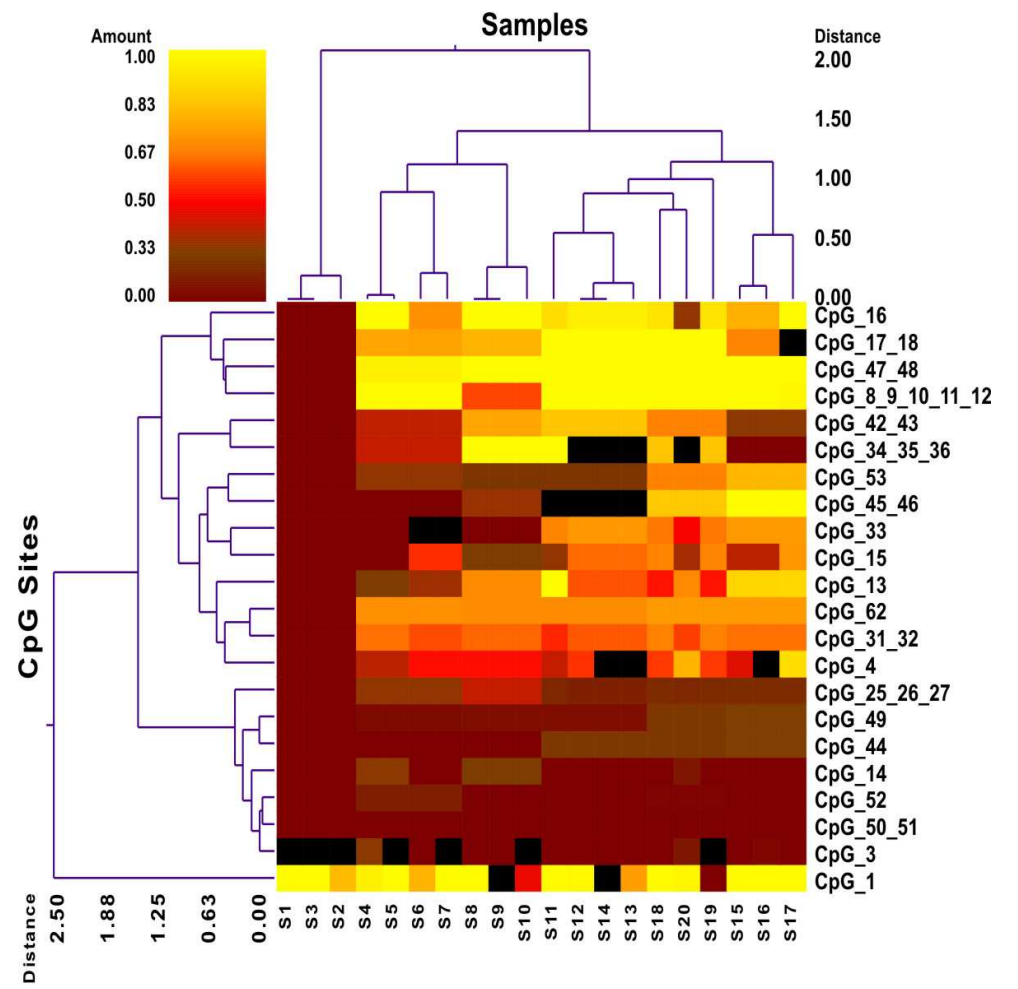

### Adjacent Normal Tissue

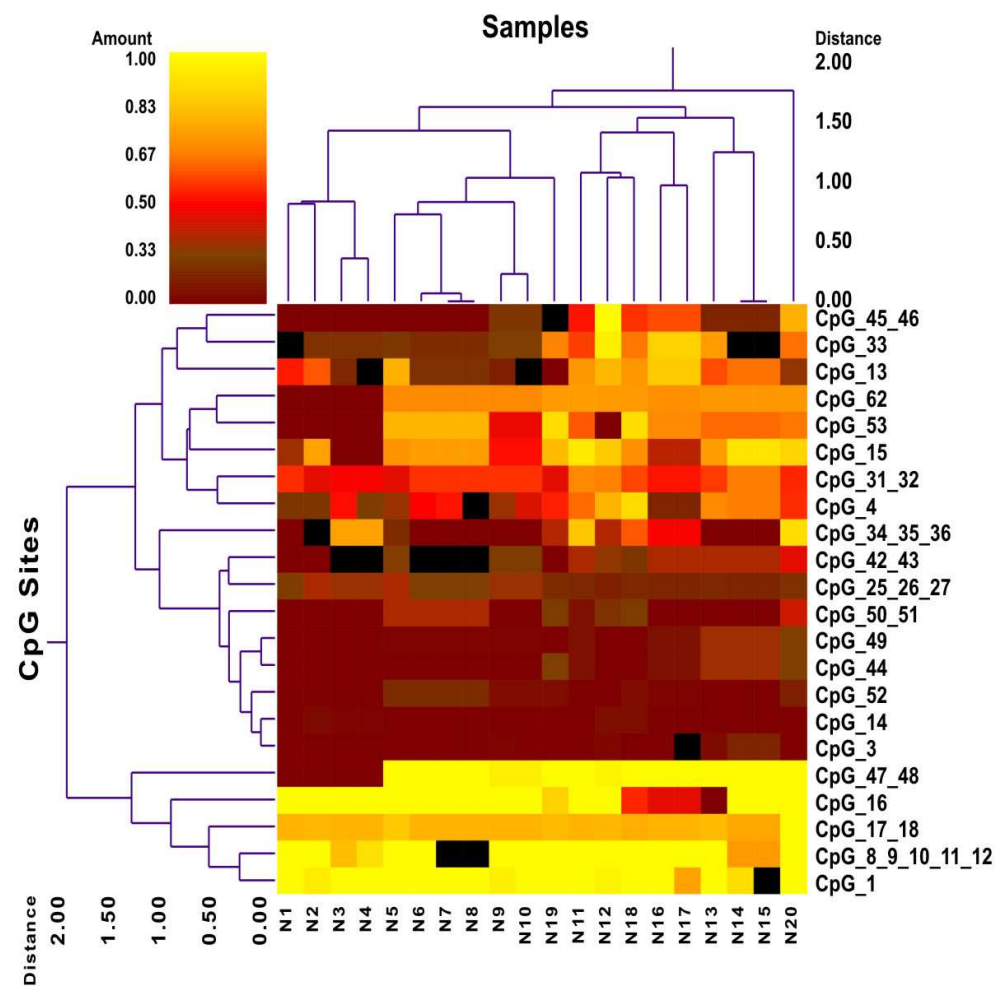

**Double dendrogram of *P16* gene:** Two-way hierarchical cluster analysis of 60 triple samples (breast cancerous tissue, matched normal tissue serum and samples) from 20 breast cancer patients. (Red clusters indicate 0% methylated, yellow clusters indicate 100% methylated, color gradient between red and yellow indicates methylation ranging from 0-100, and black clusters indicate not analyzed CpG sites).



**P21 (CDKN1A) Gene**

| Gene ID | Alternate gene name                              | locus  | Function                                                                                                                                                                                                                                             | Methylation effect on breast cancer |
|---------|--------------------------------------------------|--------|------------------------------------------------------------------------------------------------------------------------------------------------------------------------------------------------------------------------------------------------------|-------------------------------------|
| 1026    | Cyclin-dependent kinase inhibitor 1A (p21, Cip1) | 6p21.2 | Encodes protein that binds to and inhibits the activity of cyclin-CDK2 or -CDK4 complexes, and thus functions as a regulator of cell cycle progression at G1. This protein plays a regulatory role in S phase DNA replication and DNA damage repair. | direct                              |

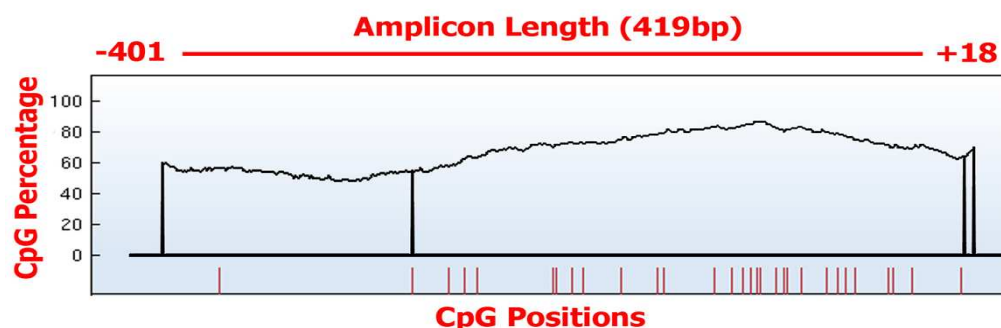

**Breast Cancerous Plasma**

**Normal Plasma**

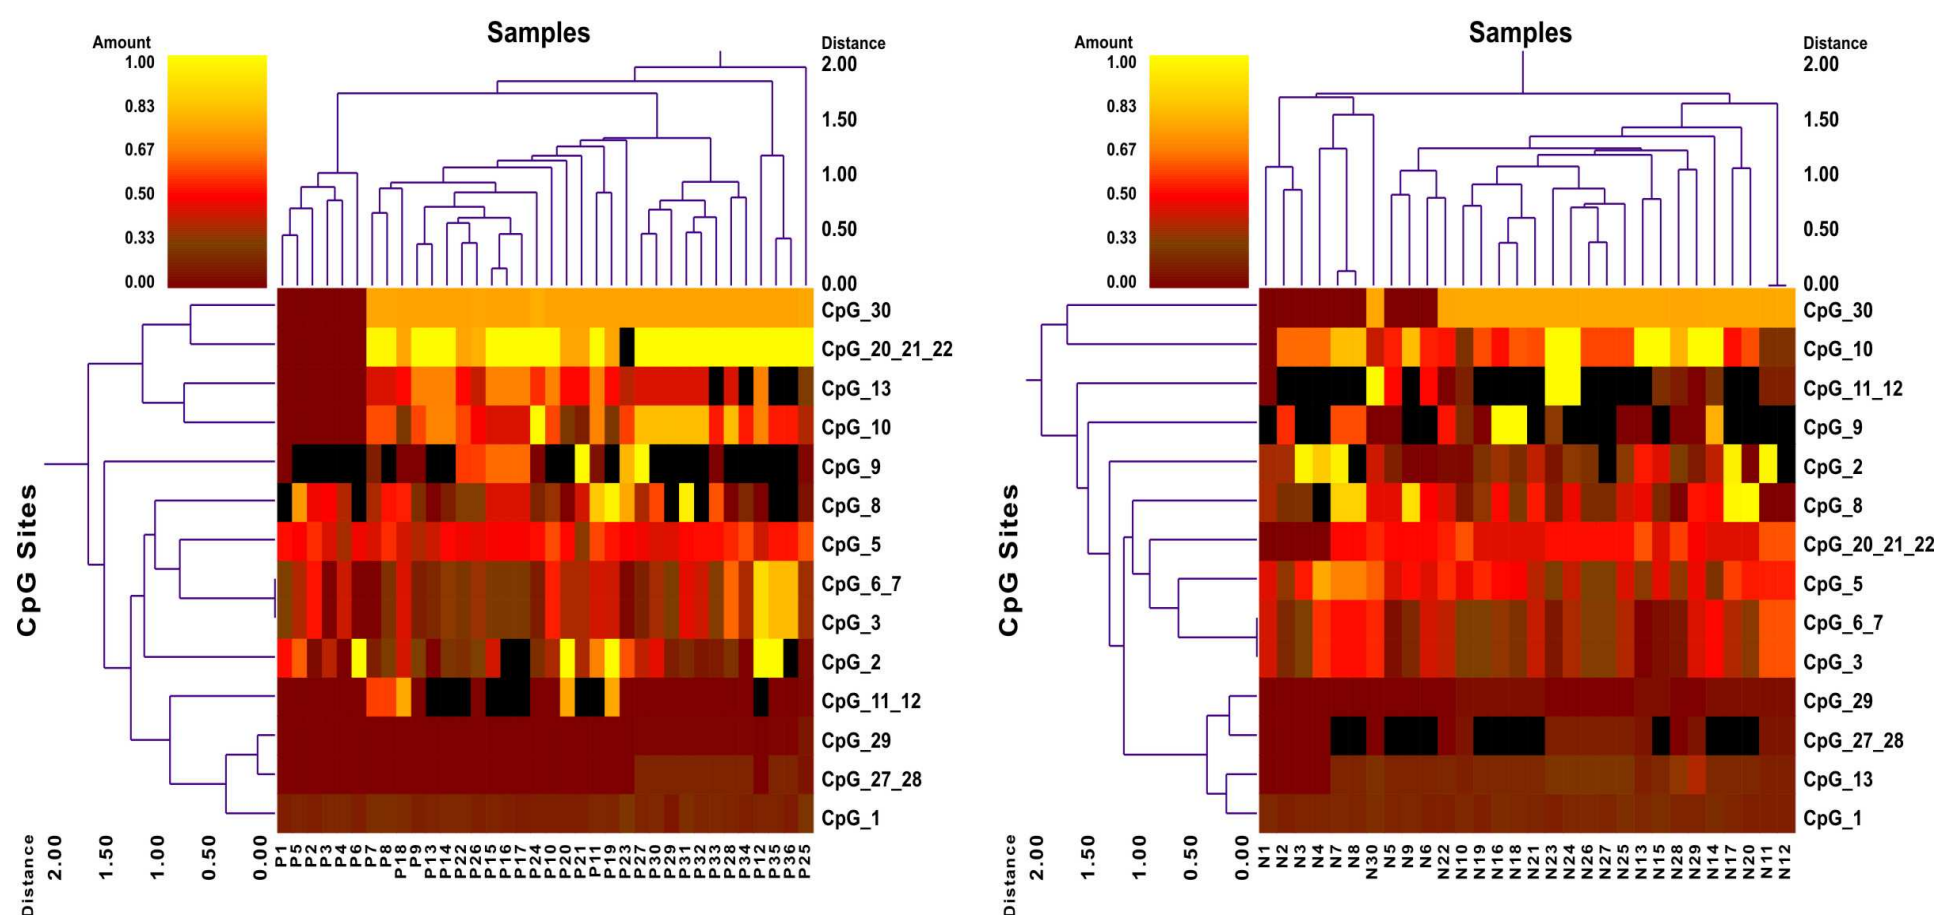

**Double dendrogram of P21 gene:** Two-way hierarchical cluster analysis of 36 plasma samples from breast cancer patients and 30 plasma samples of normal subjects. (Red clusters indicate 0% methylated, yellow clusters indicate 100% methylated, color gradient between red and yellow indicates methylation ranging from 0-100, and black clusters indicate not analyzed CpG sites).

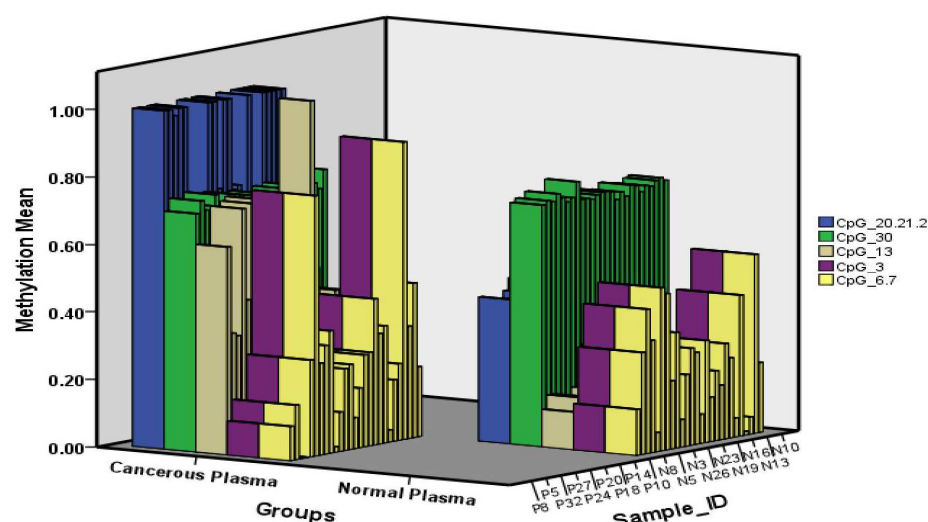

**Comparison of informative CpG sites in two groups of plasma samples.**

### Breast Cancerous Tissue

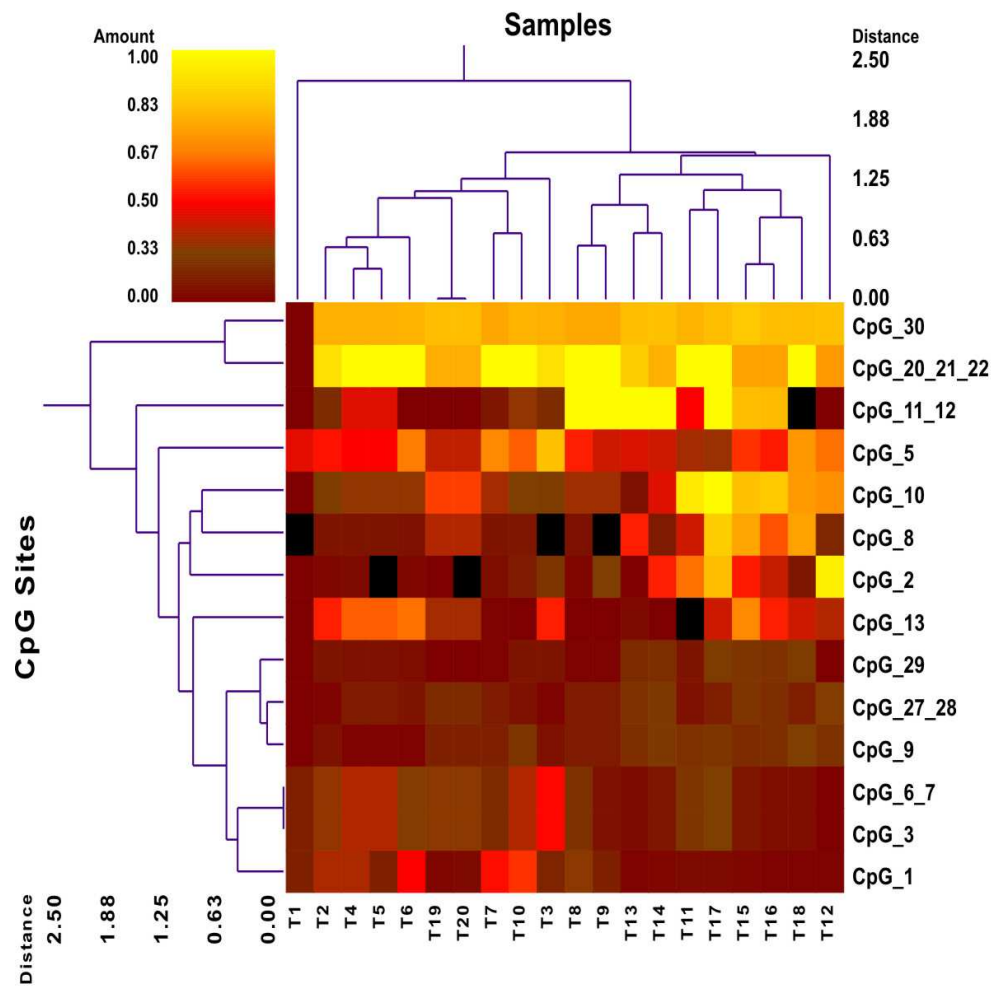

### Breast Cancerous Serum

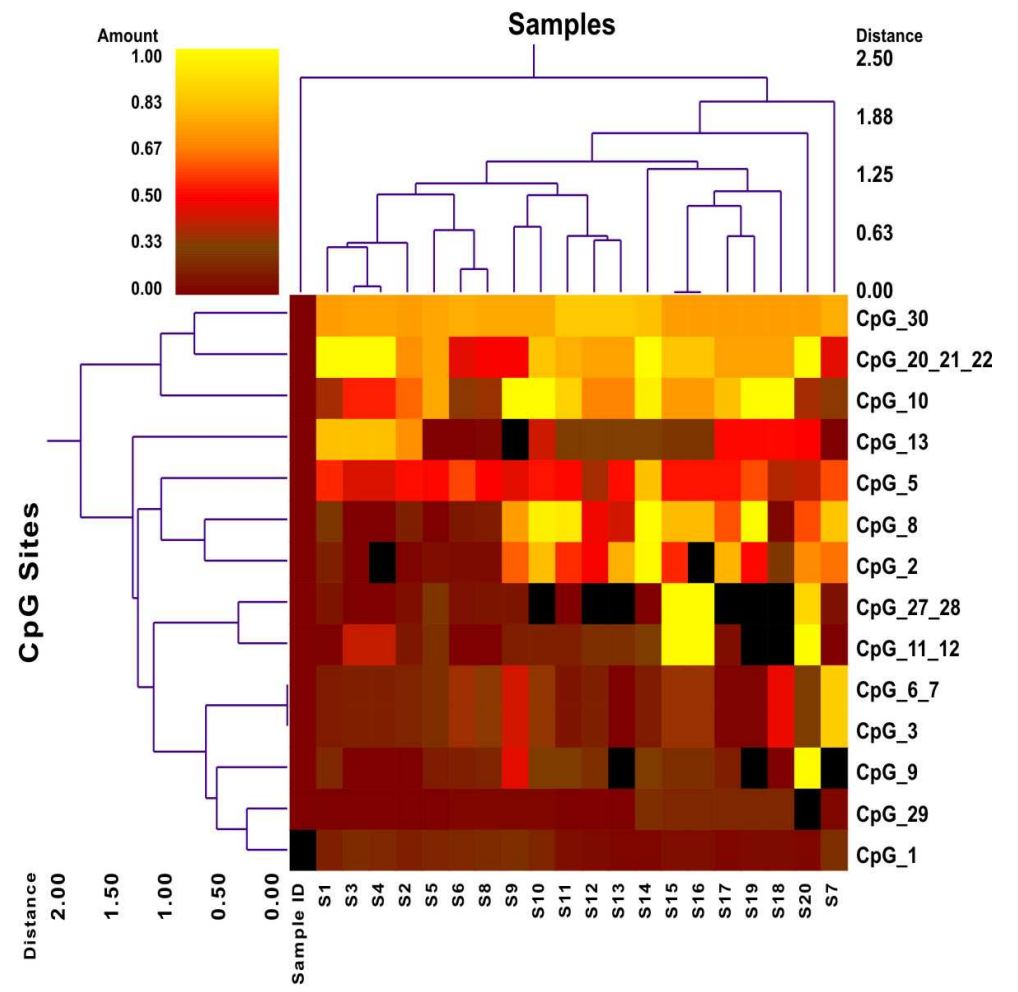

### Adjacent Normal Tissue

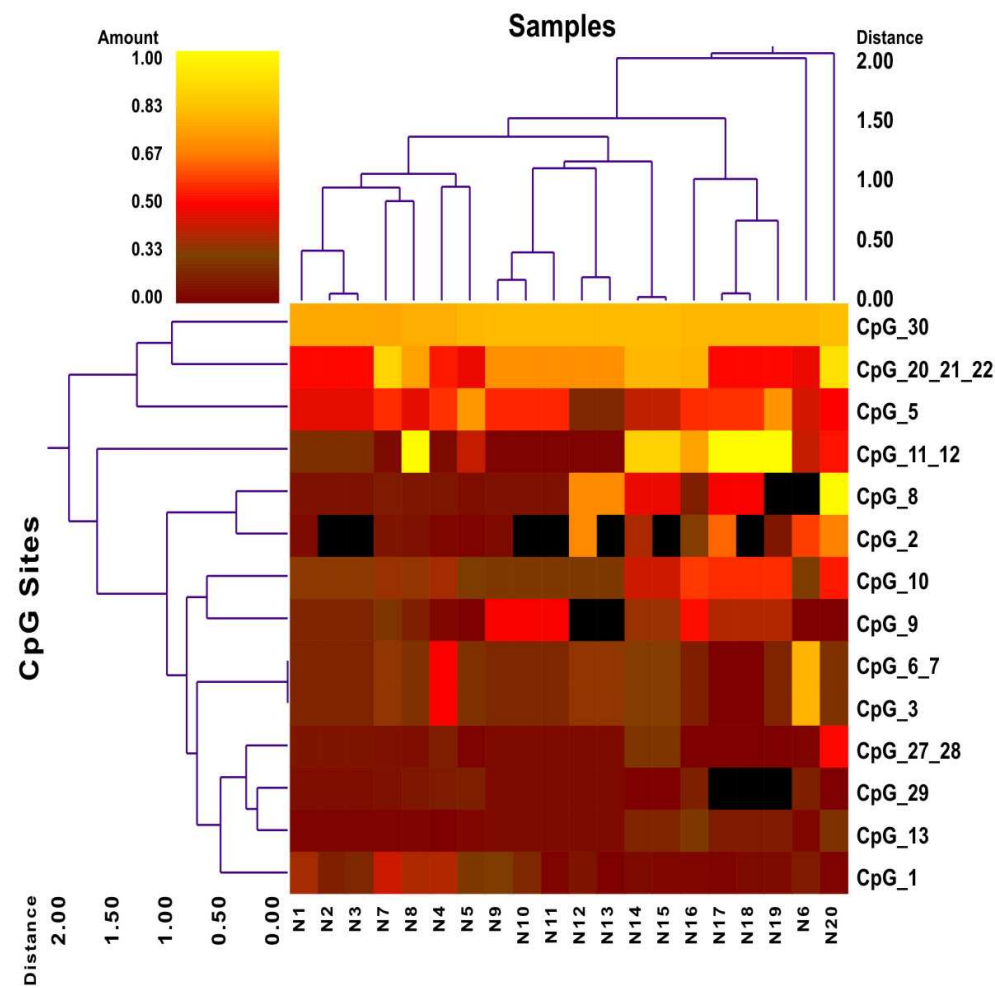

**Double dendrogram of *P21* gene:** Two-way hierarchical cluster analysis of 60 triple samples (breast cancerous tissue, matched normal tissue serum and samples) from 20 breast cancer patients. (Red clusters indicate 0% methylated, yellow clusters indicate 100% methylated, color gradient between red and yellow indicates methylation ranging from 0-100, and black clusters indicate not analyzed CpG sites).

**TIMP3 Gene**

| Gene ID | Alternate gene name                     | locus   | Function                                                        | Methylation effect on breast cancer |
|---------|-----------------------------------------|---------|-----------------------------------------------------------------|-------------------------------------|
| 7078    | Tissue inhibitor of metalloproteinase-3 | 22q12.3 | Suppresses tumour growth, angiogenesis, invasion and metastasis | direct                              |

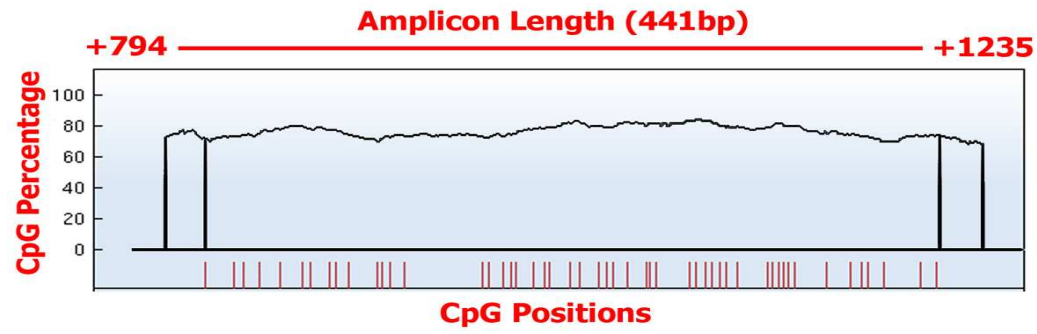

**Breast Cancerous Plasma**

**Normal Plasma**

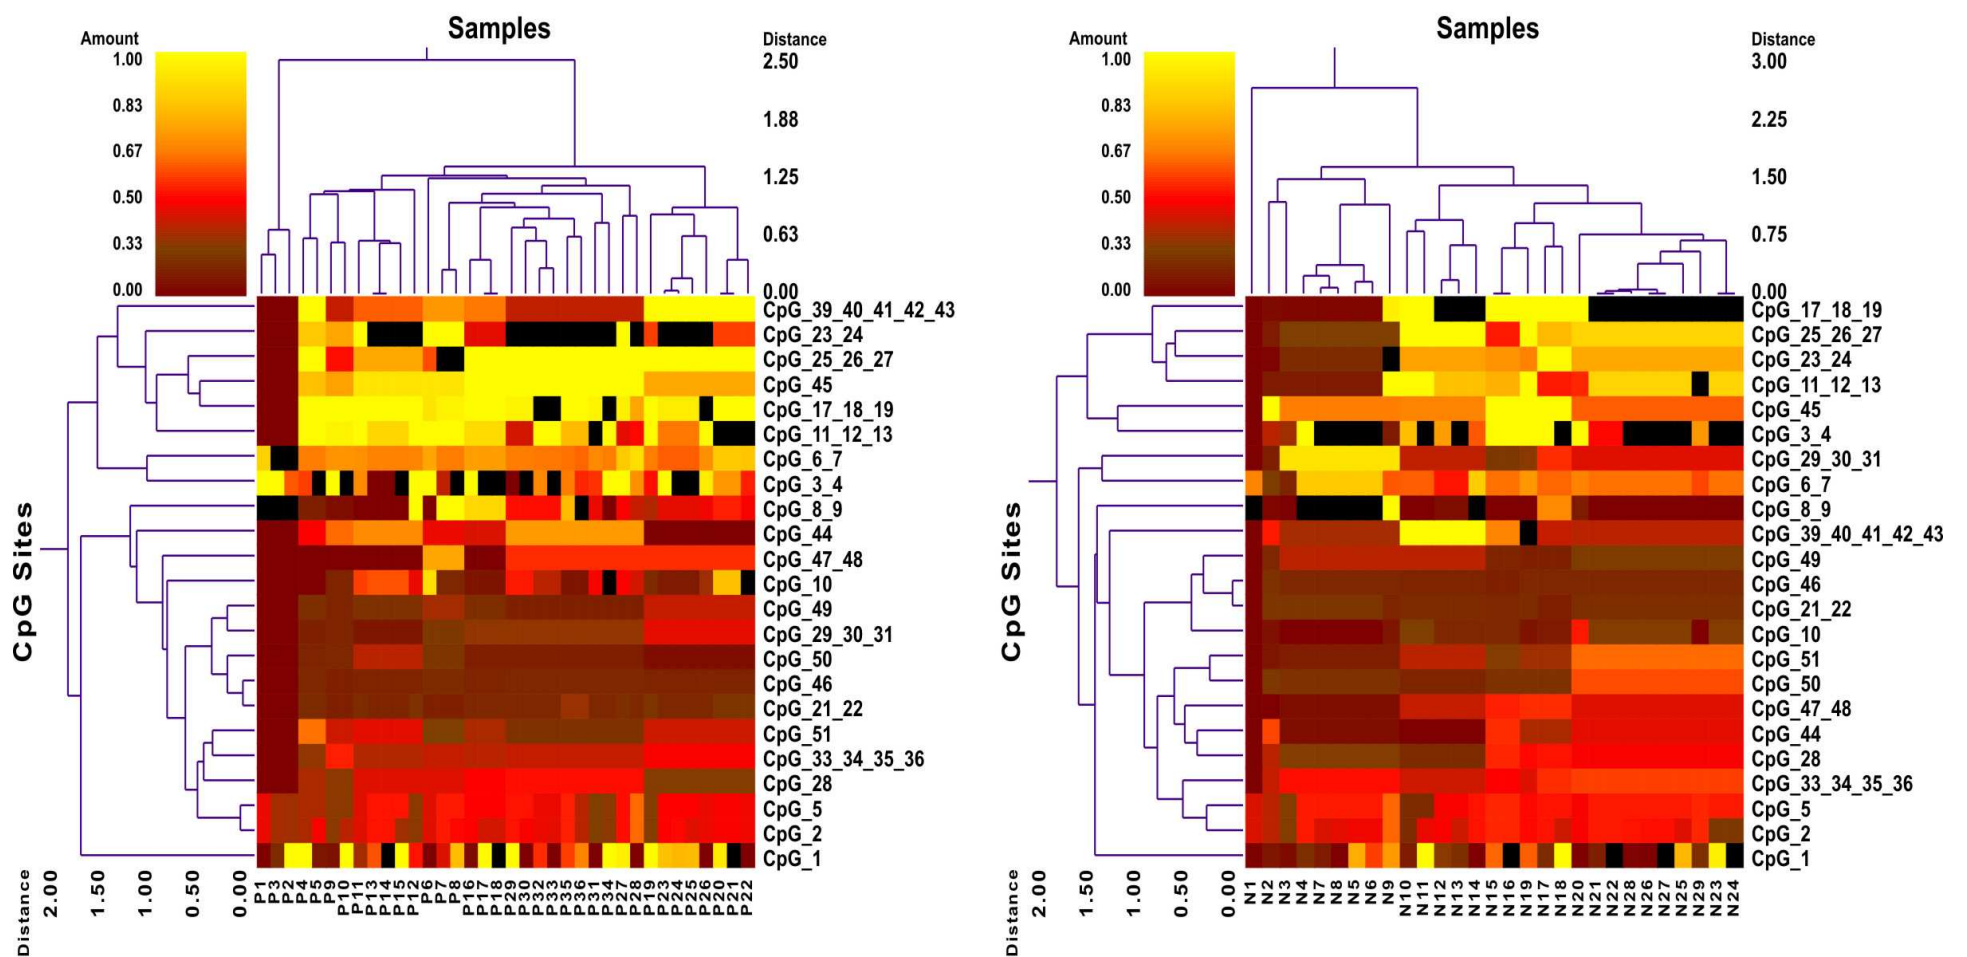

**Double dendrogram of TIMP3 gene:** Two-way hierarchical cluster analysis of 36 plasma samples from breast cancer patients and 30 plasma samples of normal subjects. (Red clusters indicate 0% methylated, yellow clusters indicate 100% methylated, color gradient between red and yellow indicates methylation ranging from 0-100, and black clusters indicate not analyzed CpG sites).

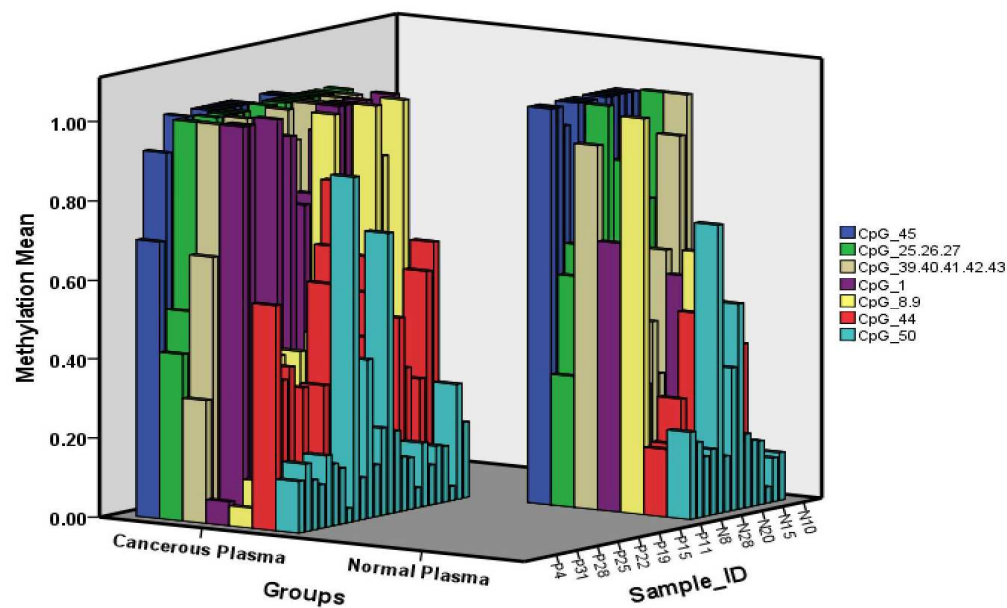

**Comparison of informative CpG sites in two groups of plasma samples.**

### Breast Cancerous Tissue

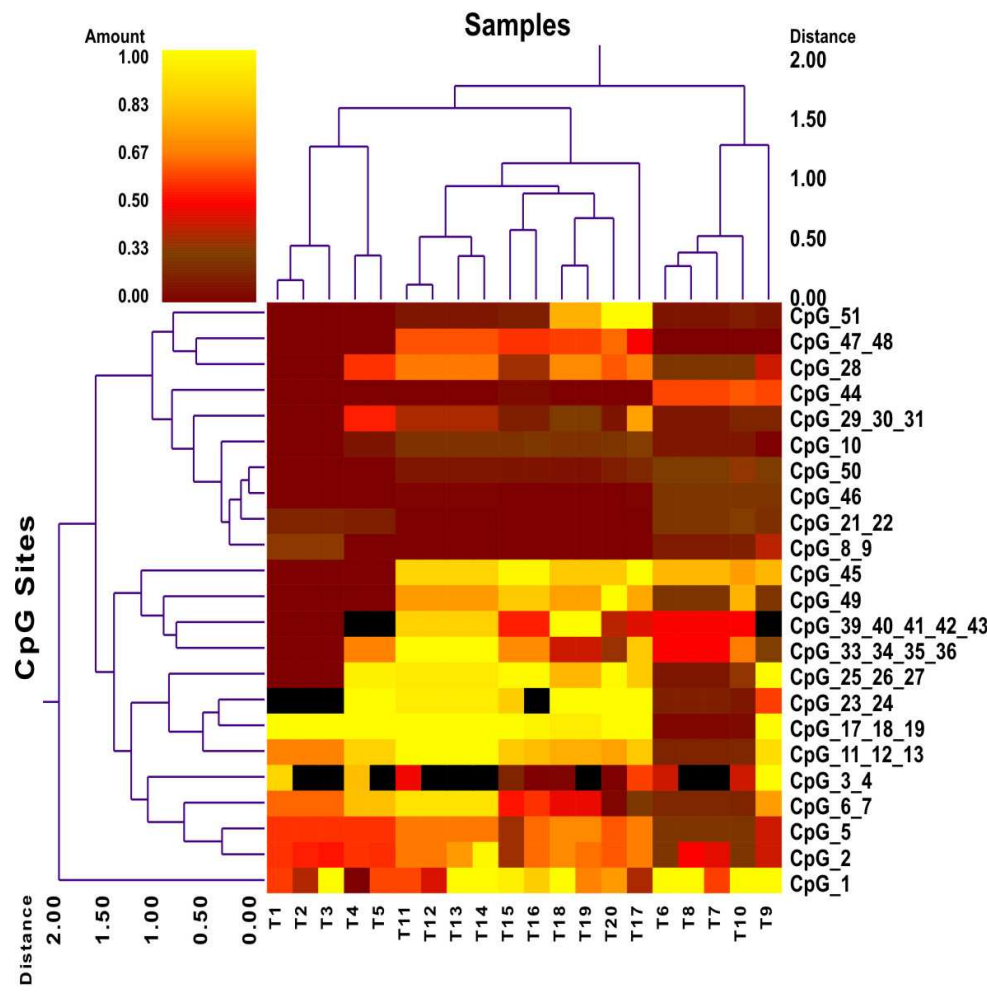

### Breast Cancerous Serum

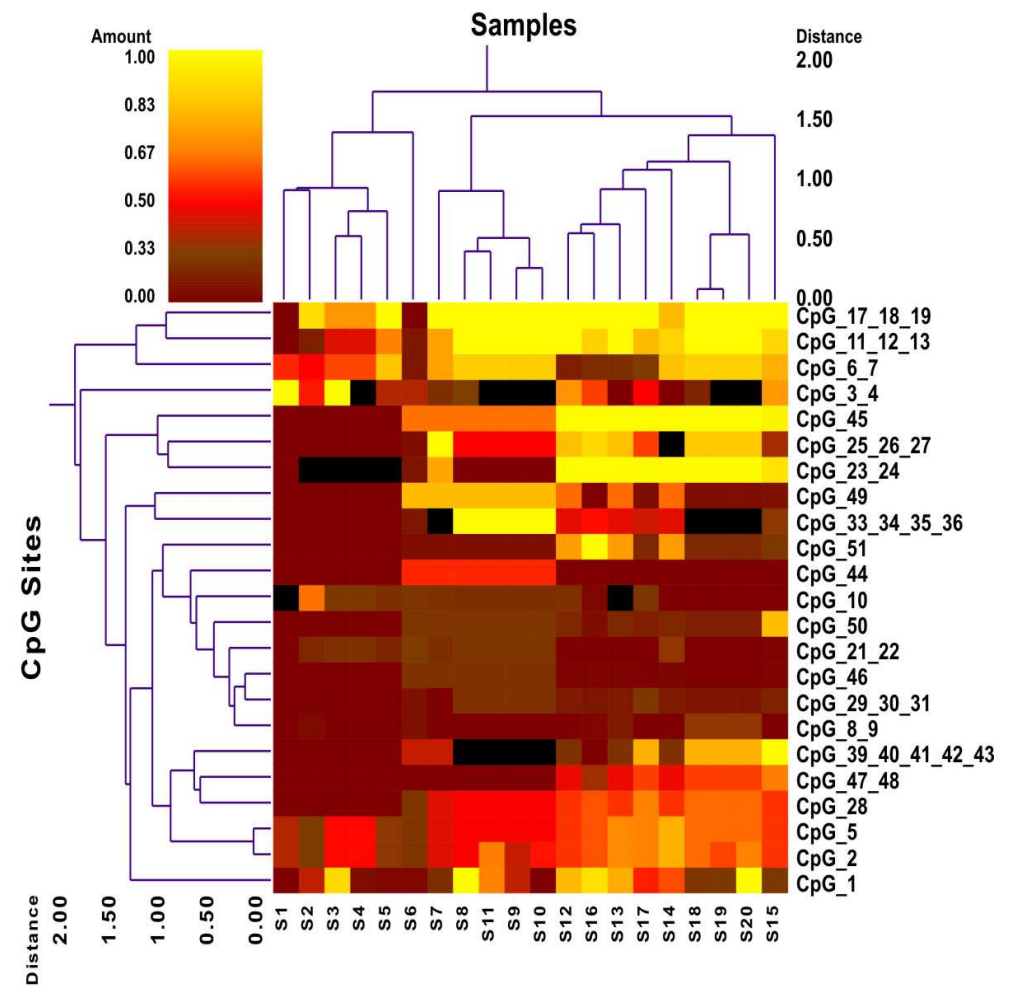

### Adjacent Normal Tissue

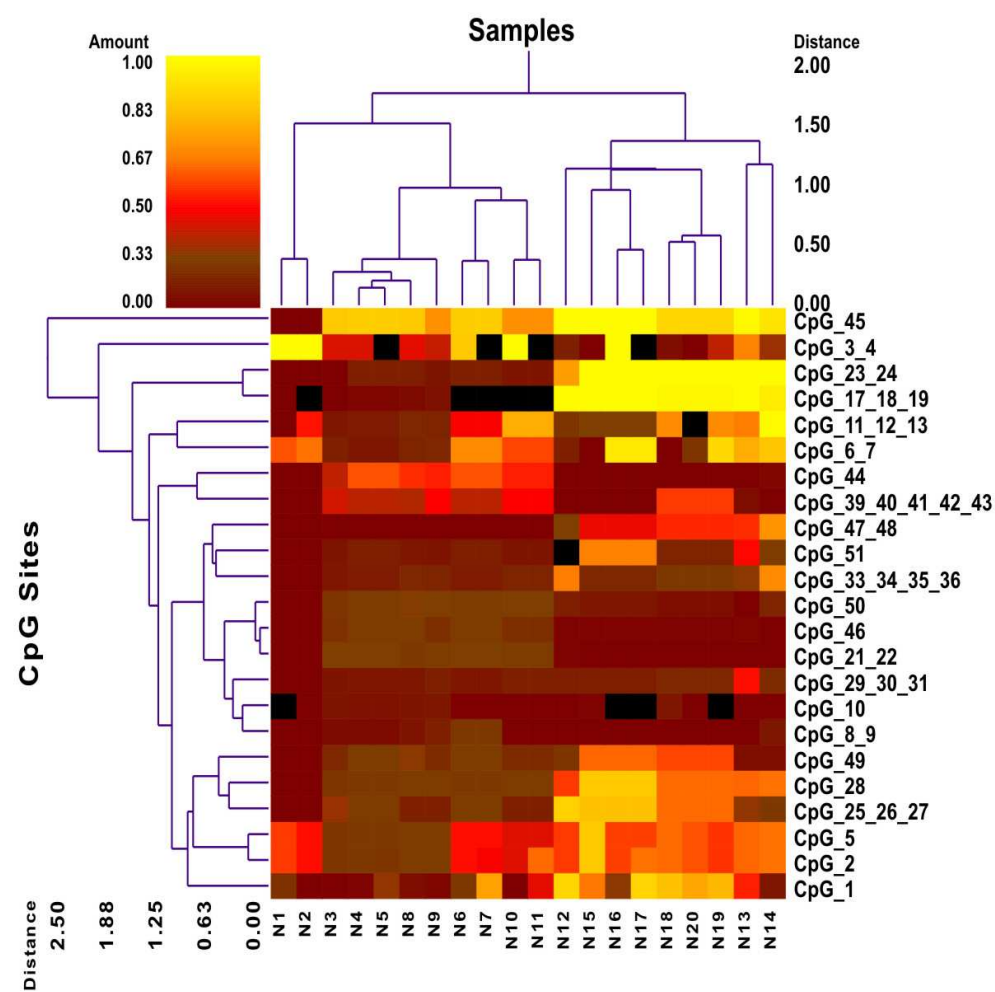

**Double dendrogram of *TIMP3* gene:** Two-way hierarchical cluster analysis of 60 triple samples (breast cancerous tissue, matched normal tissue serum and samples) from 20 breast cancer patients. (Red clusters indicate 0% methylated, yellow clusters indicate 100% methylated, color gradient between red and yellow indicates methylation ranging from 0-100, and black clusters indicate not analyzed CpG sites).
