# Supplementary material for: Hypermethylation of Tumor Suppressor Genes Involved in Critical Regulatory Pathways for Developing a Blood-Based Test in Breast Cancer
Source: PubMed Central journal article supplement (PMC3025923; doi:10.1371/journal.pone.0016080), 2011-01-24
Supplement: pone.0016080.s003.pdf [file pone.0016080.s003.pdf]

### Dataset S3

**Table 1.** Correlation study between promoter methylation of 10 studied genes and clinicopathological parameters in 36 plasma samples.

| Variables                           | Group<br>(No. of cases) | Methylation status of 10 studied genes in <i>plasma</i> samples ( <i>P</i> -value) |             |             |              |             |              |              |            |            |              |
|-------------------------------------|-------------------------|------------------------------------------------------------------------------------|-------------|-------------|--------------|-------------|--------------|--------------|------------|------------|--------------|
|                                     |                         | <i>APC</i>                                                                         | <i>BIN1</i> | <i>BMP6</i> | <i>BRCA1</i> | <i>CST6</i> | <i>ESR-b</i> | <i>GSTP1</i> | <i>P16</i> | <i>P21</i> | <i>TIMP3</i> |
| Age <sup>a</sup>                    | <50 (8)                 |                                                                                    |             |             |              |             |              |              |            |            |              |
|                                     | ≥50 (28)                | 0.209                                                                              | 0.238       | 0.577       | 0.138        | 0.402       | 0.834        | 0.036*       | 0.098      | 0.819      | 0.662        |
| Histological Grade <sup>b</sup>     | G1 (11)                 |                                                                                    |             |             |              |             |              |              |            |            |              |
|                                     | G2 (18)                 | 0.597                                                                              | 0.239       | 0.788       | 0.148        | 0.077       | 0.891        | 0.171        | 0.337      | 0.399      | 0.878        |
|                                     | G3 (7)                  |                                                                                    |             |             |              |             |              |              |            |            |              |
| Pathologic Stage <sup>a</sup>       | Early (27)              |                                                                                    |             |             |              |             |              |              |            |            |              |
|                                     | Late (9)                | 0.927                                                                              | 0.674       | 0.839       | 0.265        | 0.297       | 0.898        | 0.273        | 0.017*     | 0.351      | 0.927        |
| Lymph node involvement <sup>a</sup> | Positive (19)           |                                                                                    |             |             |              |             |              |              |            |            |              |
|                                     | Negative (17)           | 0.235                                                                              | 0.295       | 0.049*      | 0.401        | 0.310       | 0.887        | 0.466        | 0.169      | 0.715      | 0.173        |
| ER Marker <sup>a</sup>              | Positive (28)           |                                                                                    |             |             |              |             |              |              |            |            |              |
|                                     | Negative (8)            | 0.287                                                                              | 0.170       | 0.115       | 0.621        | 0.313       | 0.361        | 0.051        | 0.780      | 0.819      | 0.954        |
| PR Marker <sup>a</sup>              | Positive (23)           |                                                                                    |             |             |              |             |              |              |            |            |              |
|                                     | Negative (13)           | 0.439                                                                              | 0.339       | 0.265       | 0.564        | 0.222       | 0.729        | 0.459        | 0.163      | 0.882      | 1.000        |

**a:** Mann-Whitney U Test; **b:** Kruskal-Wallis Test; \* Significant correlation.  
**ER:** Estrogen receptor; **PR:** Progesterone receptor.

**Table 2.** Correlation study between promoter methylation of 10 studied genes and clinicopathological parameters in 20 serum samples.

| Variables                           | Group<br>(No. of cases) | Methylation status of 10 studied genes in <i>serum</i> samples ( <i>P</i> -value) |             |             |              |             |              |              |            |            |              |
|-------------------------------------|-------------------------|-----------------------------------------------------------------------------------|-------------|-------------|--------------|-------------|--------------|--------------|------------|------------|--------------|
|                                     |                         | <i>APC</i>                                                                        | <i>BIN1</i> | <i>BMP6</i> | <i>BRCA1</i> | <i>CST6</i> | <i>ESR-b</i> | <i>GSTP1</i> | <i>P16</i> | <i>P21</i> | <i>TIMP3</i> |
| Age <sup>a</sup>                    | <50 (10)                |                                                                                   |             |             |              |             |              |              |            |            |              |
|                                     | ≥50 (10)                | 0.70                                                                              | 0.705       | 0.755       | 0.364        | 0.545       | 0.140        | 0.545        | 0.151      | 0.290      | 0.364        |
| Histological Grade <sup>b</sup>     | G1 (0)                  |                                                                                   |             |             |              |             |              |              |            |            |              |
|                                     | G2 (5)                  | 0.036*                                                                            | 0.150       | 0.857       | 0.965        | 0.239       | 0.431        | 0.206        | 0.407      | 0.760      | 0.570        |
|                                     | G3 (15)                 |                                                                                   |             |             |              |             |              |              |            |            |              |
| Pathologic Stage <sup>a</sup>       | Early (12)              |                                                                                   |             |             |              |             |              |              |            |            |              |
|                                     | Late (8)                | 0.671                                                                             | 0.877       | 0.061       | 0.064        | 0.190       | 0.089        | 0.123        | 0.316      | 0.354      | 0.011*       |
| Lymph node involvement <sup>a</sup> | Positive (7)            |                                                                                   |             |             |              |             |              |              |            |            |              |
|                                     | Negative (13)           | 0.874                                                                             | 0.405       | 0.005*      | 0.251        | 0.043*      | 0.805        | 0.122        | 0.322      | 0.874      | 0.006*       |
| ER Marker <sup>a</sup>              | Positive (4)            |                                                                                   |             |             |              |             |              |              |            |            |              |
|                                     | Negative (16)           | 0.298                                                                             | 0.508       | 0.807       | 0.637        | 0.147       | 0.256        | 0.073        | 0.925      | 0.887      | 0.850        |
| PR Marker <sup>a</sup>              | Positive (10)           |                                                                                   |             |             |              |             |              |              |            |            |              |
|                                     | Negative (10)           | 0.151                                                                             | 0.597       | 0.198       | 0.705        | 0.705       | 0.198        | 0.174        | 0.174      | 0.734      | 0.705        |

**a:** Mann-Whitney U Test; **b:** Kruskal-Wallis Test; \* Significant correlation.  
**ER:** Estrogen receptor; **PR:** Progesterone receptor.
